# Co-localization and confinement of diphosphohydrolases and ecto-nucleotidases modulate extracellular adenosine nucleotide pools

Rahmaninejad<sup>1,4</sup>, Pace<sup>1,4</sup>, Bhatt<sup>2</sup>, Sun<sup>2</sup>, and Kekenés-Huskey<sup>2,3</sup>

<sup>1</sup>Department of Physics and Astronomy, University of Kentucky

<sup>2</sup>Department of Chemistry, University of Kentucky

<sup>3</sup>Department of Chemical and Materials Engineering, University of  
Kentucky

<sup>4</sup>Corresponding authors

June 13, 2019

## 1 Abstract

2 Nucleotides comprise small molecules that perform critical signaling and en-  
3 ergetic roles in biological systems. Of these, the concentrations of adenosine  
4 and its derivatives, including adenosine tri-, di-, and mono-phosphate are dy-  
5 namically controlled in the extracellular-space by diphosphohydrolases and ecto-  
6 nucleotidases that rapidly degrade such nucleotides. In many instances, the close  
7 coupling between cells such as those in synaptic junctions yields tiny extracellu-  
8 lar ‘nanodomains’, within which the charged nucleotides interact with densely-  
9 packed membranes and biomolecules. While the contributions of electrostatic  
10 and steric interactions within such nanodomains are known to shape diffusion-  
11 limited reaction rates, less is understood about how these factors control the  
12 kinetics of sequentially-coupled diphosphohydrolase/nucleotidase-catalyzed re-  
13 actions. To rank the relative importance of these factors, we utilize reaction-  
14 diffusion numerical simulations to systematically probe coupled enzyme activ-  
15 ity in narrow junctions. We perform these simulations in nanoscale geometries  
16 representative of narrow extracellular compartments, within which we localize  
17 sequentially- and spatially-coupled enzymes. These enzymes catalyze the con-  
18 version of a representative charged substrate such as adenosine triphosphate  
19 (ATP) into substrates with different net charges, such as adenosine monophos-  
20 phate (AMP) and adenosine (Ado). Our modeling approach considers elec-  
21 trostatic interactions of diffusing, charged substrates with extracellular mem-  
22 branes, and coupled enzymes. With this model, we find that 1) Reaction rates  
23 exhibited confinement effects, namely reduced reaction rates relative to bulk,  
24 that were most pronounced when the enzyme was close to the pore size and  
25 2) The presence of charge on the pore boundary further tunes reaction rates  
26 by controlling the pooling of substrate near the reactive protein akin to ions  
27 near trans-membrane proteins. These findings suggest how remarkable reaction  
28 efficiencies of coupled enzymatic processes can be supported in charged and  
29 spatially-confined volumes of extracellular spaces.

## 30 2 Introduction

31 Nucleotide signaling and regulation of cellular energy pools are reliant on the  
32 diffusion of small molecules over micrometer-scale distances [1]. Examples of  
33 processes reliant on nucleotides include signal transduction and regulation in  
34 smooth muscle [2], network motifs in transcriptional regulation networks [3],  
35 genomic regulatory networks [4], complexes of metabolic enzymes [5] and trans-  
36 membrane ligand-gated channels [6, 7]. Of the latter, many nucleotide-gated  
37 channels and ATPases [8] reside within extracellular junctions formed between  
38 cells in close apposition [9], such as synaptic junctions comprised of neurons  
39 and glia [10]. Scanning electron microscopy has revealed that many of these  
40 junctions are on the nanometer length-scale [11]. Within those spaces, we ex-  
41 pect that the free diffusion and apparent concentration of nucleotides will differ  
42 substantially from bulk solutions, although the influence of electrostatics, and  
43 confinement on diffusion properties and distributions of nucleotides have only  
44 been examined in limited detail.

45 At the cell surface, nucleotide pools are controlled by phosphohydrolases  
46 and nucleotidases [12, 13]. These enzymes hydrolyze nucleotides including  
47 adenosine- and uracil-based molecules and thereby regulate the pool of nu-  
48 cleotides available for signaling and metabolism [14]. It has for instance been  
49 demonstrated that the nucleotide concentration can vary considerably at the  
50 cell surface on both cytoplasmic and extracellular sides, as measured by the

51 activity of ATPases and ATP-sensitive channels [15, 16]. A sub-class of phos-  
52 phohydrolases called ecto-nucleotidase (NDA)s are localized to the extracellular  
53 surfaces of cell membranes. There, NDAs rapidly and dynamically control nu-  
54 cleotide concentrations adjacent to proteins that catalyze or are gated by these  
55 molecules. These include proteins such as purinergic receptors triggered by  
56 ATP and adenosine diphosphate (ADP) binding [14]. Although many NDAs are  
57 relatively nonspecific in their affinities for adenosine phosphates, some classes  
58 are selective for ATP and ADP, such as CD39a and CD39b, respectively [12,  
59 17]. Subsequently, AMP hydrolysis into adenosine proceeds via the CD78 ecto-  
60 nucleotidase [12]. In this capacity, CD39 and CD78 catalyze the coupled,  
61 sequential hydrolysis of ATP into adenosine, and thereby influence nucleotide  
62 signaling at the membrane. However, no precise characterization is available  
63 for ATP diffusion-limited reaction kinetics in nucleotide pools localized to the  
64 membrane as a result of these enzymes' spatial configurations within junctions.  
65 Thus, the pools that are actually encountered by proteins remain poorly re-  
66 solved.

67 A key foothold for understanding ATP pools is to examine factors that control  
68 the coupling of sequential reactions, such as  $ATP \rightarrow AMP$  and  $AMP \rightarrow$   
69  $Ado$ . The fundamental motif of a sequentially-controlled enzymatic process  
70 consists of two enzymes, of which one enzyme generates a reaction intermediate  
71 that is catalyzed by the second enzyme [5, 18]. For diffusion-limited reactions,  
72 the efficiency of sequentially-coupled reactions is strongly determined by the  
73 relative distance between enzymes, as well as the rates of substrate diffusion  
74 toward their reactive centers [19]. Further, sequential enzyme reactivity de-  
75 pends on the transfer efficiency of intermediates, which can be facilitated by  
76 molecular tunnels [20] or electrostatic channeling [19, 21]. An essential consid-  
77 eration is therefore how intrinsic rates of substrate diffusion in bulk solution are  
78 modulated by steric and long-range electrostatic interactions between substrates  
79 and target enzymes versus those with the surrounding cellular environment [22,  
80 23]. For instance, nucleotides are generally negatively-charged and are thus at-  
81 tracted to positively-charged nucleotide binding sites of NDA [24]. Most notably,  
82 cellular 'crowders' comprising enzymes, proteins, and macromolecules typically  
83 reduce substrates' intrinsic diffusion rates, which in turn can manifest in al-  
84 tered enzyme kinetics [23, 25–29]. Additionally, diffusion limitations stemming  
85 from densely packed media or impermeable membranes can confine substrates  
86 to narrow 'microdomains', within which substrate concentrations are vastly dif-  
87 ferent from those in the bulk cytosol or extracellular medium [30]. Based on  
88 these considerations, it is plausible that nucleotidases confined to narrow com-  
89 partments between cells will hydrolyze extant nucleotide pools with markedly  
90 different kinetics than those observed *in vitro*. However, only recently has cou-  
91 pled NDA activity been examined [31] via numerical modeling; in that study,  
92 Sandefur *et al* [31] developed a computational model of human airway surface  
93 hydration that accurately described experimentally-observed trends in NDA ac-  
94 tivity. This study was an important first step toward describing coupled NDA  
95 enzyme activities. Extension of this description to account for the extra-  
96 cellular environment between cells, including diffusion-limitation imposed by  
97 macromolecules and long-range electrostatic interactions from charged proteins  
98 and membranes are expected to give local variations that strongly differ from  
99 bulk measurements.

100 Reaction kinetics in biological media are inherently difficult to study, given  
101 the breadth of influential factors including weak interactions of substrates with  
102 lipid membranes or proteins, restricted accessible volumes owing to such crowd-  
103 ing by adjacent enzymes, proximity between enzymes involved in catalysis, and  
104 long-range electrostatic interactions. Since the systematic control of these fac-

105 tors in experiments is challenging [32], numerical models of molecular diffusion  
106 and reaction kinetics have been valuable in our understanding of catalysis in  
107 biological systems. At the coarsest resolution of such numerical models are  
108 representations of processes as networks of reactions and network motifs [18,  
109 33–36]; although these coarse representations often do not account for kinetics  
110 or enzyme proximity, they have helped to establish bounds on the function of  
111 strongly-coupled reaction networks [37]. More sophisticated models accounting  
112 for enzyme size [38–41], charge [42, 43] and co-distribution [44] are based on ordi-  
113 nary and partial differential equation formalisms that implicitly capture these  
114 effects. Recent ordinary differential equations (ODE) approaches that implic-  
115 itly consider the distributions of finite-sized enzymes include a mean field the-  
116 ory from Rao *et al* [45]. These models provided strong quantitative insights  
117 into the efficiency of catalytic processes [46] and limits on efficiency gains for  
118 sequentially-coupled enzymes [45], but only implicitly account for geometrical  
119 and physiochemical factors. Explicit consideration of those factors for coupled  
120 enzyme processes generally utilize partial differential equations or particle-based  
121 solutions, which have afforded descriptions of how neighboring reactive enzymes  
122 [29, 47, 48], feedback inhibition, [29, 46], protein geometry and electrostatic in-  
123 teractions [19, 21, 49, 50] contribute to enzyme activity. Still, a systematic  
124 study of sequential reaction phenomena under physiological variations in sol-  
125 vent ionic strength and intracellular confinement is needed for probing how  
126 nucleotide pools are regulated by sequential NDAs in geometrically-constrained  
127 intercellular junctions.

128 Our key objective was therefore to quantify how cellular and organelle mem-  
129 branes tune NDA sequential enzyme activity and local nucleotide pools. This  
130 study was investigated in a model, biomimetic material for which the materi-  
131 al porosity and surface composition could be controlled. Our approach uses  
132 a finite-element based partial-differential equation model developed in [51], for  
133 which we introduced explicit enzymes [23] to quantify how conditions such as  
134 lipid charge, ionic strength, porosity tune the efficiency of protein functions  
135 that utilize diffusing molecular substrates. Our key findings are that NDA co-  
136 localization and their charge complementarity with substrates can offset reduced  
137 reaction rates owing to their confinement in nanoscale volumes; moreover, tun-  
138 ing of pore surface properties further improve nucleotidase reaction efficiency.  
139 Through precise control of co-localization, the ratios of signal can be controlled.  
140 In this regard, NDA activity is strongly influenced by its environment, which  
141 can lead to reaction kinetics that differ relative to *in vitro* measurements.

## 142 3 Results

### 143 3.1 Overview

144 We have developed a computational model of sequential nucleotidase reactions  
145 confined to a narrow space between apposed cells. The reactions are activated  
146 by ATP diffusing from neighboring cells. This geometry consists of a pore with  
147 nanometer-scale radius spanning between two reservoirs to emulate a femtoliter-  
148 scale volume confined between two coupled cells. We impose an ATP gradient  
149 oriented parallel to a micrometer-length pore to reflect nucleotide diffusion into  
150 the pore. We summarize the conditions run in Table S1.

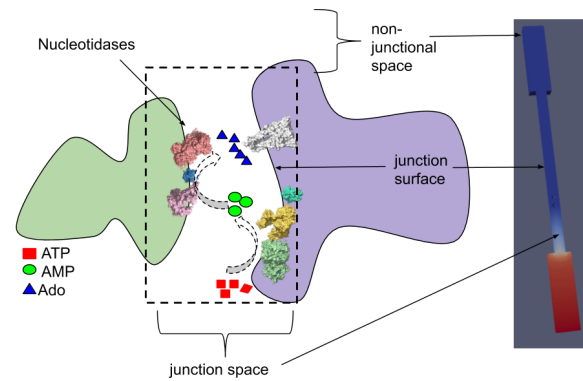

Figure 1: Left) Schematic of the synapse-like junctional space formed between the membranes of adjacent cells. Nucleotidases confined within the junctional space hydrolyze ATP into AMP and Ado. Right) A model geometry based on the schematic, for which the reservoirs correspond to the non-junctional space. The spatial and electrostatic configuration of the mock synapse influence the reactivity of confined nucleotidases CD39 and CD78. .

151 Within the pore we consider two sequential, CD39- and CD73-catalyzed ATP  
152 and AMP hydrolysis reactions that are in steady-state. With this model, we  
153 examine how enzyme co-localization, ‘tethering’ the enzymes to the pore wall,  
154 and charges on the enzyme and pore surfaces shape enzyme kinetics within the  
155 idealized pore volume. Although we assume that the enzymes are spherical  
156 with uniform reactivity and charge, we have found that such representations  
157 are reasonable approximations of structurally-detailed, non-uniformly charged  
158 proteins we have examined in other studies [52, 53], but are considerably less  
159 computationally expensive to evaluate.

### 160 3.2 Effects of molecular pore confinement on enzymatic 161 activity

162 Coupled enzyme reactions have been widely studied in a variety of contexts, in-  
163 cluding isolated globular enzymes and along surfaces. Here we extend these  
164 approaches to examine nucleotide hydrolysis reaction kinetics for NDA en-  
165 zymes embedded within nanoscale gaps between cells, which we emulated with  
166 nanopores of varying radii (see Fig. 1). These pores are representative of small,  
167 well-contained extracellular volumes, such as junctions formed between adjacent  
168 cells or synapsing neurons. We vary the relative distance between enzymes to  
169 investigate how co-localization impacts reaction efficiency, as well as their dis-  
170 tance to the pore as to simulate surface-tethered versus freely-floating enzymes.  
171 In such geometries, substrate access to the enzyme is restricted to a narrow  
172 volume, which is expected to decrease the diffusion-limited reaction rate. To  
173 quantify the dependence of enzyme reactivity on nanopore volume, we numer-  
174 ically solved Equation 12 for substrate species ATP, AMP and Ado subject to  
175 the boundary conditions defined in Table 1. We defined the reaction efficiency  
176 as the ratio of the substrate Ado production rate coefficient,  $k_{prod,C}$  over the  
177 substrate ATP association rate coefficient,  $k_{on,A}$ . Since the association rate of  
178 AMP is equal to the Ado production rate, the reaction efficiency highlights how  
179 the reactivity of AMP is shaped by the system configuration independent of the  
180 ATP reaction rate. This ratio is identical to the ratio of the association rate  
181 coefficient of AMP to the production rate coefficient of AMP. We further note  
182 that this ratio of rate coefficients is identical to the ratio of particle flux values.  
183 We will use this identity to simplify the calculations, as the flux values are a  
184 more direct result of the numerical simulations.

We first validate our model against an analytical solution for the diffusion  
limited reaction rate coefficient on a uniformly reactive sphere. [54] Here, the  
association rate,  $k_{on}$ , for the reactive sphere embedded in an infinite domain is  
given by

$$k_{on} = 4\pi RD \quad (1)$$

185 where  $R$  is the radius of the enzyme and  $D$  is the substrate diffusion coeffi-  
186 cient. For the purpose of validation, we evaluate this rate at the sphere (0.5  
187 nm radius) by assuming a uniform concentration for ATP (1.0 mM) at both the  
188 reservoir and pore (11.5 nm diameter). We will later assume no-flux (reflective)  
189 boundary conditions for the concentration along the pore to emulate a typical  
190 non-reactive pore boundary. Under the aforementioned conditions, we numer-  
191 ically estimated a rate of  $k_{on,ATP}=3.611 \times 10^{-3} \text{ nm}^3 \text{ ns}^{-1}$ , which is within 5%  
192 of the analytical estimate of  $k_{smol,bulk}=3.768 \times 10^{-3} \text{ nm}^3 \text{ ns}^{-1}$ . The minor dis-  
193 crepancy can be attributed to the nonspherical domain used for the numerical  
194 simulation, whereas a radially-symmetric domain is assumed in Eq. 1. We here-  
195 after refer to this as the ‘bulk’ configuration, for which the enzyme concentration  
196 corresponds to roughly 0.19 mM. To establish a frame of reference for our re-

197 sults using reflective pore boundaries (see Table 1), in Fig. 2 we demonstrate a  
 198 numerical prediction of  $k_{on,ATP}=1.151 \times 10^{-3} \text{ nm}^3 \text{ ns}^{-1}$ , which is within 1.8%  
 199 of the analytical result,  $k_{smol,local}=1.13 \times 10^{-3} \text{ nm}^3 \text{ ns}^{-1}$ , for which we used the  
 200 concentration . For this estimate, we average the bulk ATP concentration of  
 201 the sphere centered within the pore. Both approaches confirm the reliability  
 202 of the model for reproducing analytic results for diffusion-limited association  
 203 reactions.

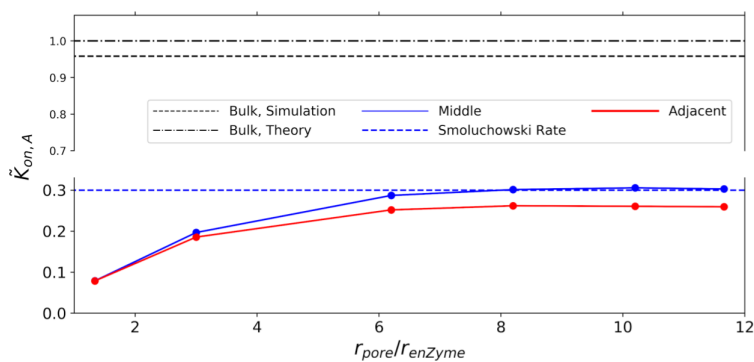

Figure 2: **Effects of confinement and proximity** Normalized reaction rate coefficients of ATP to CD39, including comparison of simulation results to the analytical value for bulk conditions based on the Kimball-Collins relation. The vertical axis is broken to emphasize the dependence on pore radius.

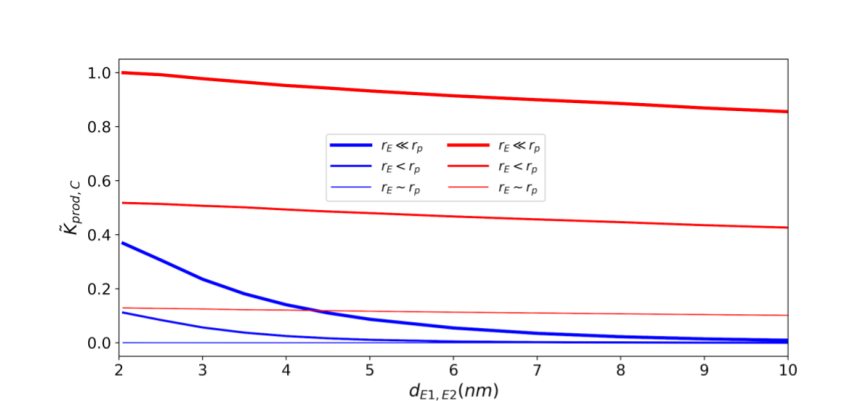

Figure 3: **Effects of confinement and proximity** Normalized reaction rate coefficient for the second enzyme at different pore sizes and enzyme proximities. Blue lines are for absorbing boundary conditions to emulate an open, bulk-like configuration, and red lines are for reflecting boundary conditions.  $\tilde{k}$  is normalized with respect to the maximal  $K_{prod}$  value at  $\min d \max r_p$ .



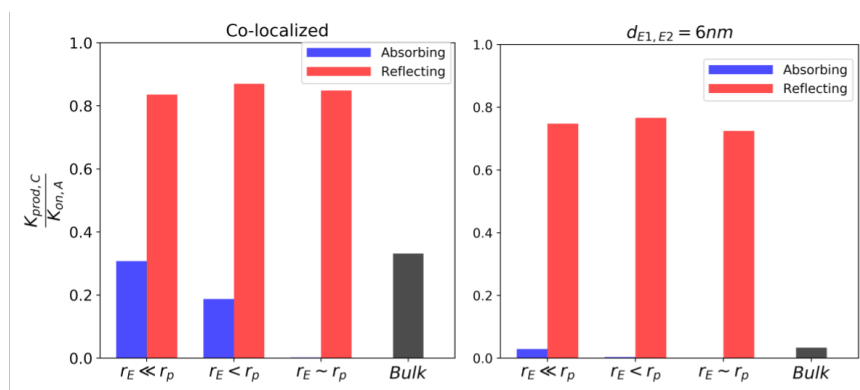

Figure 4: **Effects of confinement and proximity** Efficiency of reactivity of second enzyme respect to first enzyme. Left panel: enzymes co-localized. Right panel: enzymes separated by 6 nm. Efficiencies for the absorbing case approach 0 as  $r_p \rightarrow r_E$ .

204 Using our validated model we investigated how the reaction of substrate ATP  
 205 on CD39 is influenced by confinement within a nanoscale channel. These sim-  
 206 ulations were conducted assuming a constant concentration gradient along the  
 207 dominant axis of the channel. In Fig. 2) we present normalized association rates  
 208 for ATP with enzyme CD39,  $\tilde{k}_{on} \equiv k_{on,A}/k_{on,Bulk}$ , subject to a constant en-  
 209 zyme radius ( $r_E = 1.0$  nm) and varied pore diameters ( $r_E \approx r_p$  with  $r_p = 1.3$  nm  
 210 ,  $r_E < r_p$  with  $r_p = 3.0$  nm, and  $r_E \ll r_p$  with  $r_p = 5.5$  nm). Confinement of  
 211 the enzyme to the pore reduced the reaction rate coefficient by roughly 70%  
 212 relative to the corresponding rate in bulk ( $\tilde{k}_{on} = 1$ ). This can be qualitatively  
 213 rationalized by the concentration profiles manifest in the channel (see Fig. S1).  
 214 The concentration profile decreases from  $A=6.0 \times 10^{-4}$  nm<sup>-3</sup> at the right-hand  
 215 side reservoir ( $\Gamma_R$ ) and approaches zero at the left-hand side reservoir ( $\Gamma_L$ ). As  
 216 the pore radius decreases from  $r_p \gg r_E$  to  $r_p > r_E$ , the concentration of ATP  
 217 within the pore decreased relative to the reservoir. Hence, pore confinement  
 218 in essence reduces the substrate concentration at the enzyme surface, which  
 219 culminates in a reduced  $k_{on,ATP}$ .

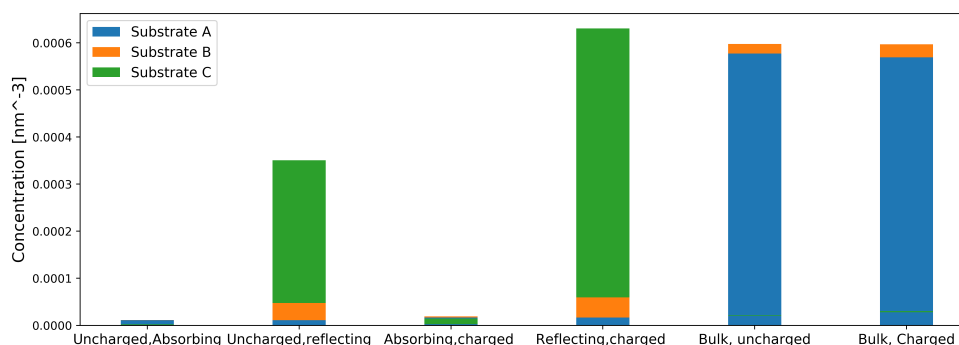

Figure 5: **ATP, AMP and Ado concentrations at midpoint between enzymes for different pore wall boundary conditions.** CD39 and CD73 are separated by a distance of 6.0 nm.

220 We additionally varied the proximity of the enzyme to the pore surface.  
221 This variation serves as a proxy for probing the reactivity of enzymes that are  
222 essentially free floating within the pore interior versus immobilized to the pore  
223 surface. The reactivity of CD39 was additionally reduced, albeit negligibly, as  
224 CD39 was localized to the pore surface. This can be rationalized by noting  
225 the similarity between the time-independent diffusion equation and the Laplace  
226 equation commonly used in electrostatics (see Eq. 15 with  $\kappa = 0$ ).

227 The total electric flux is dependent on the capacitance; as the sphere ap-  
228 proaches an insulator wall ( $J \cdot n = 0$ ), the capacitance decreases [55], which  
229 decreases the total electric flux. The total electric flux is the electrostatic equiv-  
230 alent of the concentration flux in substrate diffusion, hence, the numerically-  
231 estimated  $k_{on,ATP}$  values were smaller for immobilized enzymes relative to those  
232 far from the surface. Altogether, these results demonstrate that restricting the  
233 diffusion of ATP within the pore and to a slightly greater extent, near the pore  
234 wall, suppress  $k_{on,ATP}$  relative to the bulk.

235 Reduction of  $k_{on,ATP}$  through enzyme confinement of enzymes is expected  
236 to subsequently suppress production rates for AMP and Ado. However, co-  
237 localization of enzymes within ‘nano reactors’ is a common approach to tune  
238 production rates of desired chemical products [44, 46, 56]. We therefore intro-  
239 duced a second enzyme, CD73, into the pore and simulated the steady state  
240 reactions  $ATP \rightarrow AMP$  at CD39 and  $AMP \rightarrow Ado$  at CD73. In Fig. 3) we  
241 first report Ado production rate coefficients,  $k_{prod,Ado}$ , as a function of enzyme  
242 separation and for non-reactive (reflective) and reactive (absorbing) pore sur-  
243 faces. These values are normalized with respect to the  $k_{prod,Ado}$  value obtained  
244 for  $r_p \gg r_E$  and maximal enzyme separation ( $d_{CD39,CD73}=1$ ). The normalized  
245  $k_{prod,Ado}$  rate coefficients are negligibly impacted as enzyme separation is re-  
246 duced within a boundary that is nonreactive with AMP (e.g. reflective); this  
247 indicates that enzyme colocalization has negligible impact on  $k_{prod,Ado}$  if AMP  
248 does not interact with the pore boundary (e.g. reflective). If absorbing condi-  
249 tions are assumed, that is AMP is depleted at the pore, then there is a kinetic  
250 advantage to enzyme colocalization; this is demonstrated by the increased rates  
251 with reduced  $d_{CD39,CD73}$  in Fig. 3) that are accentuated for increasing pore  
252 sizes. Hence, as the domain approaches the bulk-like system where AMP can  
253 escape from the reaction complex, the advantage of enzyme proximity becomes  
254 apparent and is consistent with recent studies of enzyme co-localization [19,  
255 45, 46]. In summary, the nature of the intermediate, AMP, interactions with  
256 the surface appear to determine the relative advantage of enzyme colocaliza-  
257 tion in closed, nanoscale domains. For example, in a scenario where enzymes  
258 auxiliary to NDAs are depleting nucleotides, NDA enzymes would benefit from  
259 co-localization.

260 To delineate the effects of pore confinement and enzyme colocalization on  
261  $k_{on,AMP}$  and  $k_{prod,Ado}$  independent of  $k_{on,ATP}$ , we report in Fig. 4) the Ado  
262 production efficiency,  $k_{eff}$ , which we define as  $k_{eff} \equiv k_{prod,Ado}/k_{on,ATP}$ . The  
263 efficiencies reported for co-localized enzymes (left panel) are consistently higher  
264 than those for separated enzymes (right panel), with the largest increases demon-  
265 strated for reactive pore boundaries (blue) or open (red, bulk) configurations.  
266 Hence, under circumstances that permit intermediates to diffuse away from or  
267 compete with the reactive centers, there is a clear advantage to colocalization,  
268 akin to findings in [45]. However, in the absence of substrate interactions with  
269 the pore surface, confinement leads to higher overall efficiencies that monoton-  
270 ically decrease with increasing pore radius, but have little dependence on enzyme  
271 proximity.

### 272 3.3 Effects of surface charge on reaction rate coefficient

273 In the previous section we demonstrated that confinement of enzymes like the  
274 ectonucleotidases to nano-scale extracellular domains suppresses the overall re-  
275 action rate coefficient of uncharged substrates. Co-localization of the reactive  
276 centers mitigated this reduction to a modest extent. Naturally, the adenosine  
277 substrates are charged, with ATP having the most negative charge and AMP  
278 the least. Hence, their concentrations and diffusion rates are expected to be sen-  
279 sitive to the charge configuration of their binding partners and the surrounding  
280 lipid bilayer environment. It is well-known, for instance, that many enzymes  
281 have evolved to exploit electrostatic interactions to accelerate substrate bind-  
282 ing [42]. Further, there is strong evidence that local ionic concentration near  
283 charged membranes yield concentrations of  $\text{Ca}^{2+}$  and  $\text{Na}^+$  that deviate sig-  
284 nificantly from the bulk [57, 58]. We therefore expanded the approach in the  
285 previous section to consider competing or complementary effects of electrostatic  
286 interactions in coupled enzyme kinetics.

287 In this section, we model the contribution of electrostatic interactions be-  
288 tween substrates and their environment using the Smoluchowski electro-diffusion  
289 equation (see Eq. 8), for which the electrostatic potential was modeled using the  
290 linearized Poisson-Boltzmann equation (see Eq. 15). We first validate our imple-  
291 mentation under dilute solvent conditions ( $\kappa \rightarrow 0$ ) and assume that the pore and  
292 CD73 are uncharged. The association rate for a substrate with charge  $q_A$  with  
293 a spherically-symmetric enzyme of radius,  $r_E$  and charge  $q_E$  can be analytically  
294 determined [19]:

$$k = 4\pi D \left( \frac{Q_s \exp(Q_s/r_D)}{\exp(Q_s/r_E) - \exp(Q_s/r_D)} \right) \quad (2)$$

295 with  $Q_S \equiv q_A q_E \lambda_B$ , where  $r_D$  is the radius of the domain within which the  
296 reaction is confined and  $\lambda_B$  is the Bjerrum length. Accordingly, we demonstrate  
297 in Fig. S2 that as  $\kappa \rightarrow 0$  ( $\log(\kappa) \rightarrow -\infty$ ) the numerically-predicted  $k_{on,ATP}$  rates  
298 for  $z_{ATP}=-1$  and  $\Phi_{CD39} = 25$  mV approach the analytical estimate within 6%  
299 percent, and thus reasonably validate the electrostatic model.

300 Using the validated electro-diffusion model, we first examined changes in  
301 CD39 reactivity by confinement within an electrically-neutral pore, subject to  
302 electrostatic interactions between a negatively charged substrate A, positively  
303 charged CD39 and variably charged CD73. We assumed surface potentials of  
304  $\pm 19.2$  mV for the enzymes based on  $\zeta$  potentials measured for proteinaceous  
305 solutions by Salgn *et al* [59]. Further, although adenosine metabolite  
306 charges vary from -4 to 0, and because Ado is commonly chelated by  $\text{Mg}^{2+}$   
307 [60], we used charges of -2, -1 and 0 for ATP, AMP and Ado, respectively,  
308 to exemplify effects on reactivity. Under these conditions,  $k_{on,ATP}$  decreases  
309 as the pore radius to enzyme radius decreases as was observed for the neutral  
310 system (see Fig. 6). Importantly,  $k_{on,ATP}$  for the charged system does assume  
311 a higher rate coefficient than the neutral system. Hence, the electrostatic in-  
312 teractions in essence counterbalance the reduction in reaction rate coefficients  
313 due to confinement. Moreover, NDAs complementary charge with nucleotides  
314 exploits fast association. Additionally, consistent with [19], when CD73 and  
315 CD39 assume the same charge complementary to the intermediate, increased  
316  $k_{on,ATP}$  rate coefficients result, owing to the attraction between enzymes and  
317 the substrate.

318 We next imposed a negative electric potential on the pore surface and  
319 present the resulting reaction rate coefficients (red in Fig. 7). We chose sur-  
320 face charge densities consistent with biological membranes reported by surface

321 conductivity microscopy such as DPTAP=15.1 mC m<sup>-2</sup> , DPPE=5.3 mC m<sup>-2</sup>  
322 and DPPG=-44.0 mC m<sup>-2</sup> for positively charged, zwitterionic and negative  
323 charged lipid bilayers, respectively [61]. We first examine effects of the pore  
324 electric potential,  $\Phi_{pore}$ , on reaction kinetics, assuming CD73 is uncharged.  
325 In Fig. 7 we demonstrate that in general  $k_{on,ATP}$  monotonically decreases re-  
326 gardless of the membrane charge. In the event that the pore interactions with  
327 substrate ATP are repulsive ( $\Phi_p < 0$ ), the reaction rate coefficient decreases at  
328 a faster rate. However, in certain regimes the charge complementarity of the  
329 pore surface was found to greatly accelerate  $k_{on,ATP}$  relative to the neutral pore,  
330 whereas a repulsive pore ( $\Phi_{pore} < 0$ , blue) attenuated  $k_{on,ATP}$  by roughly 17%  
331 or  $3.77 \times 10^{-1} \text{ nm}^3 \text{ ns}^{-1}$  (see Fig. 6) for  $r_p \sim 6r_E$  ). We attribute the enhanced  
332 reaction rate coefficient for the positively charged membrane to the elevated  
333 concentration adjacent to the membrane relative to the uncharged membrane,  
334 which effectively raised its average concentration within the pore ( $\Phi$ ). That is,  
335 the complementary charged pore surface drew ATP into the pore interior and  
336 thereby facilitated the reaction on CD39. Hence, the charge of the pore sur-  
337 face stemming from different phospholipid compositions can strongly influence  
338  $k_{on,ATP}$ , and in turn control AMP productions ATP degradation via CD39.

339 Interestingly, attractive pore/ATP interactions initially accelerate  $k_{on,ATP}$   
340 as the pore diameter is reduced, whereafter the rate declines. We find the  
341 maximal acceleration is achieved when the pore size is roughly six-fold higher  
342 than the enzyme radius (see Fig. S3). This maximum is dependent on the wall  
343 potential amplitude, namely as the attractive wall potential amplitude increases,  
344 the maxima shift to smaller pore/enzyme size ratios . In previous studies [51,  
345 52, 62], it has been demonstrated that weakly attractive interactions with pore  
346 boundaries can enhance diffusion and ion conductivities, which is consistent  
347 with the initial increase in  $k_{on,ATP}$  in our model. However, this acceleration in  
348 diffusion due to attractive interactions is eventually outweighed by the hindrance  
349 of diffusion as the pore is narrowed. Additionally, although diffusion is likely  
350 accelerated, the amount of substrate able to interact with the target is reduced,  
351 as we saw for uncharged cases. Hence, attractive pore potentials served to co-  
352 localize substrates near the pore wall and therefore offset the reduced reaction  
353 volume that would otherwise decrease the overall reaction rate coefficient (see  
354 Fig. S7), as might be expected for ATP with positively charged phospholipids.

355 We initially anticipated that positioning the protein directly adjacent to the  
356 membrane would improve the reactivity relative to the pore center. Further, we  
357 observe that  $k_{on,ATP}$  can be amplified when the enzymes are tethered to the  
358 pore surface under specific conditions, namely wide pores and strong attraction,  
359 but this advantage is generally minor and thus of limited consequence to NDAs  
360 (Fig. S6). We found little difference for  $k_{on,ATP}$  at modest ( $< |25|$  mV) pore  
361 potentials for far in Fig. S7). This appears to be consequence of reduced access  
362 to the enzyme as it approaches the wall, which counterbalances the increased the  
363 concentration of ATP near the surface due to attractive electrostatic interactions.

364 Electrostatic enhancement of  $k_{on,ATP}$  is generally expected to promote  $k_{on,AMP}$  and  
365  $k_{prod,Ado}$ , thus we examined the extents to which the intermediate species'   
366 charge and enzyme proximity control  $k_{eff}$ . We present results assuming a  
367 positively-charged intermediate ( $z_{AMP}=1$ ) to emphasize the electrostatic con-  
368 trol of the sequential reactions. Consistent with findings from the neutral sys-  
369 tem and our previous studies of sequential enzyme channeling [19], we find that  
370  $k_{prod,Ado}$  increases as the enzymes are brought into close proximity ( $\tilde{d}_{E1E2} \rightarrow 0$ ).  
371 As observed in the preceding section, the absorbing pore boundaries show the  
372 greatest sensitivity to enzyme distance, with favorable AMP /CD73 electrostatic

373 interactions for  $\Phi_{CD73} < 0$  yielding faster  $k_{prod,Ado}$  reaction rate coefficients relative to neutral CD73, and conversely slower rates for positively-charged CD73. The enhancement in the former case reflects both the electrostatic attraction of substrate AMP toward CD73, while ATP is electrostatically repelled toward CD39, which culminate in increased  $k_{on,AMP}$  and  $k_{prod,Ado}$ , respectively. In the latter case, the positively charged CD73 repels AMP and attracts the negatively-charged A, which in effect competes with the reaction of ATP on CD39. Hence, the enzymes' charge complementarity with their respective substrates enhances the overall reaction rate coefficient relative to uncharged systems and thereby offsets the suppressed rate due to confinement within the pore. In this regard, co-localization of the nucleotidases can ensure reasonable reaction efficiency despite confinement in pore. Further, these results confirm trends identified in [19, 45, 46] that enzyme colocalization can support higher overall reaction rate coefficients under specific conditions, albeit here we consider such effects in the context of confinement to the pore.

388 Attractive interactions between substrate ATP and a positively-charged surface lead to the greatest overall enhancements of  $k_{prod,Ado}$ . There is, however, a limit to this acceleration, if the attractive interactions between the pore and substrate are stronger than the target enzyme, as we demonstrate with a reduction in  $k_{on,ATP}$  demonstrated in Fig. S6. It is interesting that attractive A/pore interactions dominate the sequential enzyme kinetics, given the likely repulsion of cationic B species from the reactive centers, which could suppress the overall reaction efficiency. To assess the extent to which AMP /pore interactions contribution to  $k_{prod,Ado}$ , we examined the  $k_{eff}$  ratios for the nonreactive pore boundaries. Based on the efficiencies reported in Fig. 8, most of the increased production rate can be attributed to  $k_{on,ATP}$ , as the efficiencies were largely constant across the various charge configurations. However, efficiencies were generally greater for co-localized enzymes versus separated configurations, regardless of the pore charge. For negatively-charged pores ( $\Phi_{pore} < 0$ ), the reaction efficiency was enhanced for all configurations, except for colocalized enzymes directly adjacent to the pore. In analogy to the effects of the pore charge on ATP, the increased efficiency for positively-charged pores can be rationalized by the pooling of anionic AMP within the pore, which increases  $k_{on,AMP}$ . This concurs with our findings of enhanced reaction efficiency in dihydrofolate reductase-thymidylate synthase (DHFR-TS) [21] owing to its complementary surface charge to the dihydrofolate intermediate, in contrast to a neutral or electrically-repulsive surface. For the co-localized cases at the membrane surface, it is likely that the membrane significantly competed with the binding of B at CD73, which led to a reduced reaction rate coefficient. Overall, these results suggest that favorable A/membrane interactions largely control the absolute  $k_{prod,Ado}$  rate, with co-localization typically further enhancing  $k_{prod,Ado}$  and  $k_{eff}$ . The contributions of B/pore interactions play a comparatively smaller role, perhaps given the limited extent to which B permeated the pore relative to A.

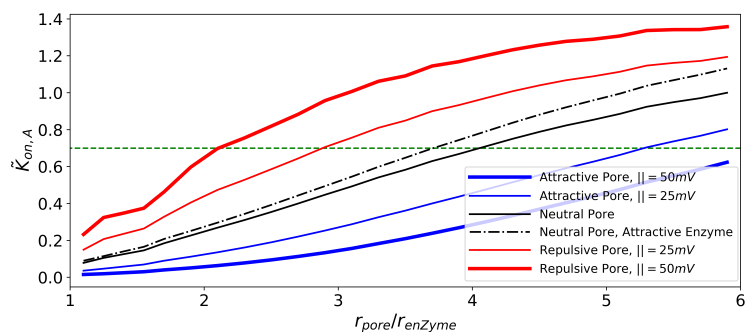

**Figure 6: Effects of charge** Effect of charge sign composition on reactivity, given  $z_{ATP}=-1$ ,  $z_{AMP}=+1$ ,  $z_{Ado}=0$  and  $\Phi_{CD39} > 0$  Effect of pore electrical potential on reactivity of enzyme for different sizes of the pore. We define an effective pore radius for charged pores, to be obtained from the green dashed line. For relatively small pores, the effective pore radius is larger for attractive pores, and smaller for repulsive pores. For relatively larger pores, competition between the pore wall and the enzyme becomes more significant, leading to a decline in the reactivity of attractive pores (see Fig. S3 in which with decreasing the size of enzyme we allow larger relative sizes of pore to enzyme radius).

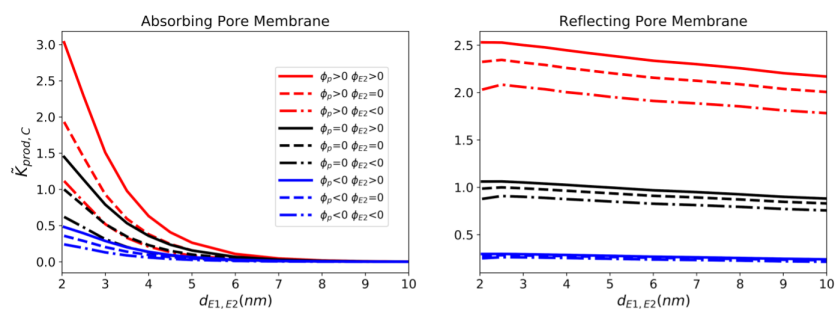

Figure 7: **Effects of charge** Effect of charge sign composition on reactivity, given  $z_{ATP}=-2$ ,  $z_{AMP}=-1$ ,  $z_{Ado}=0$  and  $\Phi_{CD39} > 0$  Normalized reaction rate coefficient for production of Ado as a function of distance between enzymes. .



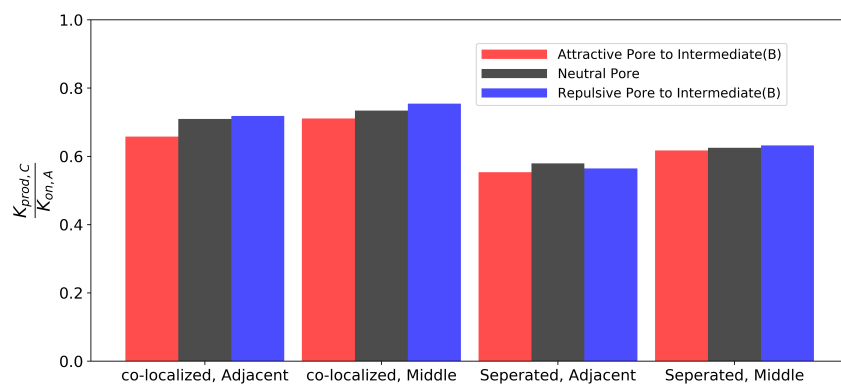

Figure 8: **Effects of charge** Efficiency of sequential enzymes for different pore wall electric potentials, given  $z_{ATP}=-2$ ,  $z_{AMP}=-1$ ,  $z_{Ado}=0$  and  $\Phi_{CD39} > 0$ . Corresponding values for  $k_{on,ATP}$  are provided in Fig. S7 .

In the previous section, we highlighted reaction rate coefficients and efficiencies without accounting for electrostatic screening by common electrolytes. To model physiological conditions characterized by roughly 100 millimolar monovalent ion concentrations, we solved the linearized Poisson-Boltzmann equation, assuming Debye lengths on the order of 1 nm. This Debye length signifies that electrostatic interactions are significantly screened, which will in turn modulate reaction kinetics. To assess effects on  $k_{on,ATP}$ , it is helpful to compare rates as a function of  $(1 + a\kappa)$ , where  $a$  is the enzyme radius and  $\kappa$  is the inverse Debye length (see Fig. 9). This functional form is motivated by the relationship

$$\ln k_a = \ln k_{I=0} - \frac{A|z_1 z_2| \sqrt{I}}{1 + Ba\sqrt{I}} \quad (3)$$

$$(4)$$

417 where  $I$  is the ionic strength, while  $A$  and  $B$  are generally fitting parameters  
418 introduced by Schreiber *et al*[63]. This latter term stems from the Debye-Huckel  
419 treatment of electrolyte solutions.

420 In Fig. 9a), we demonstrate the scaling of  $\ln[k_{on,A}]$  with respect to  $(1 +$   
421  $\kappa a)^{-1} \rightarrow 1$ , assuming either attractive or repulsive substrate interactions with  
422 CD39 and pore. For attractive interactions, the maximum rate enhancement  
423 relative to an electrically-neutral reference system is found under dilute condi-  
424 tions signified by  $\kappa \rightarrow 0$  or equivalently,  $(1 + \kappa a)^{-1} \rightarrow 1$ . At high ionic strength  
425 ( $\kappa \rightarrow \infty$ ), the rates approach those of the neutral system. By accounting for  
426 electrolyte screening, reaction rate coefficients are somewhat attenuated, which  
427 will in turn depress  $k_{prod,Ado}$  and potentially  $k_{eff}$ . Accordingly, we reevaluated  
428 the effects of enzyme co-localization and pore proximity on  $k_{prod,Ado}$  and  $k_{eff}$ ,  
429 subject to the 150 mM KCl background electrolyte. As anticipated,  $k_{prod,Ado}$   
430 generally scales proportionally to  $k_{on,ATP}$  as a result of A/pore interactions  
431 largely setting the overall reaction rate coefficient relative to the intermediate.  
432 This is further evident in the negligible impact of ionic strength on  $k_{eff}$ . We  
433 additionally found that the trends in  $k_{eff}$  and  $k_{prod,Ado}$  relative to enzyme co-  
434 localization and pore proximity did not significantly deviate from those reported  
435 in electrolyte-free conditions and are therefore not reported here. Overall, while  
436 physiological ionic strength conditions modestly impact reaction kinetics relative  
437 to dilute conditions, the changes are fairly insignificant and also insensitive  
438 to moderate changes in ionic strength typical in physiological systems. In other  
439 words, fluctuations in signaling ion concentrations are not likely to significantly  
440 modulate NDA behavior.

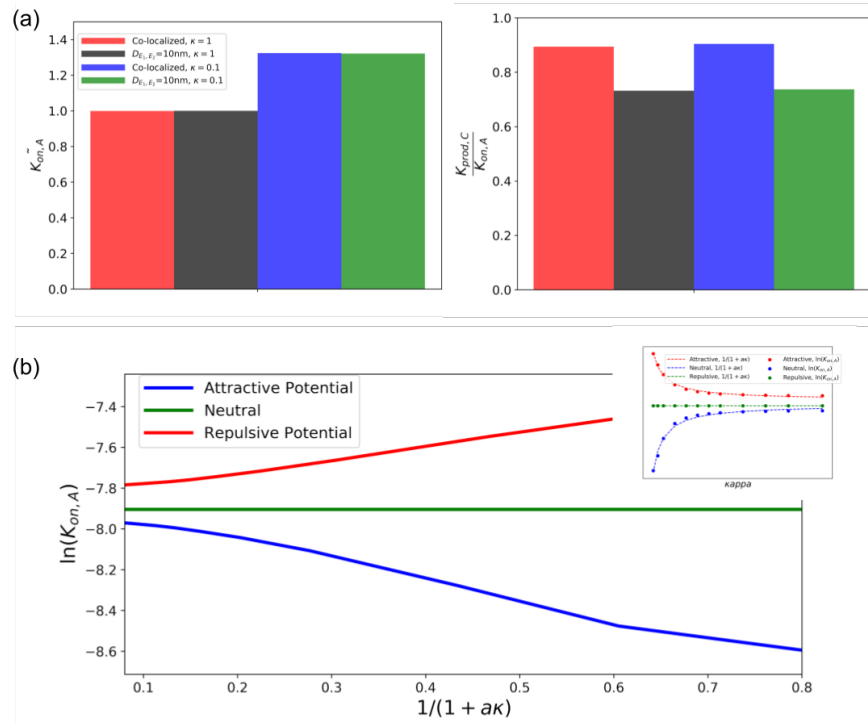

Figure 9: **Effect of Debye Length on reactivity of sequential enzymes:**  
a) Efficiency and first enzyme reactivity for large and small Debye lengths for co-localized and separated enzymes for  $\Phi_{CD39} > 0$ ,  $\Phi_p > 0$  and  $\Phi_{CD73} < 0$   $z_{ATP} = -1$  and  $z_{AMP} = 1$  b) Relationship between  $\ln(k_{on})$  and  $(1 + a\kappa)^{-1}$  for three different pore electrostatic potentials. Subpanel shows fitting of curve to simulation data points. .

## 441 4 Discussion

### 442 4.1 Summary

443 In this study, we probed how nucleotide pools are controlled by ecto-nucleotidase  
444 (NDA) and nucleotidase enzymes within narrow junctions formed between ad-  
445 jacent cells, similar to synaptic junctions comprising neurons. Here we used  
446 numerical solutions of steady-state reaction-diffusion models of coupled nucleoti-  
447 dases that were recently studied in cystic fibrosis but assuming spatially uniform  
448 behavior [31]. These simulations were performed under physiological conditions  
449 that included confinement to narrow junctions bordered by cell plasma mem-  
450 brane and long-range, ionic strength-mediated electrostatic interactions. This  
451 three-dimensional approach resolved important factors governing the fast re-  
452 action rates of NDAs in biological systems, that were not readily apparent in  
453 prior numerical approaches based on ordinary (spatially-independent) differen-  
454 tial equations. Our key findings were

- 455 • that independent of NDA activity, nucleotide distributions within confined  
456 extracellular junctions can significantly differ relative to open, bulk-like  
457 configurations
- 458 • that NDA steady-state reaction rates are generally smaller when localized  
459 to small junctions, but reaction efficiency can improve by co-localizing  
460 coupled enzymes, and
- 461 • that these reaction rates can be substantially accelerated when NDA and  
462 plasma membrane adopt charges complementary to reacting substrates,  
463 especially when the membrane attracts the relevant substrate.

464 Adenosine nucleotides encompass a set of small, polar molecules that are  
465 critical for cellular signaling and metabolism [14]. These nucleotides are gener-  
466 ated or regulated by diverse processes, including secretion from neighboring cells  
467 in tissue [64], as products of membrane-bound F1-ATPases [65], transport via  
468 ectopic adenine nucleotide translocases [66] or hydrolyzed by ecto-nucleotidase  
469 (NDA). For many cellular systems, these processes occur within femtoliter-scale  
470 [11, 67] regions between neighboring cells, such as those characteristic of neu-  
471 ronal synapses [68]. Here, co-localization of NDAs including CD39 with puriner-  
472 gic receptors within caveolae [69] or with extracellular ATP release sites on  
473 astrocytes [70] can give rise to ‘compartmented’ nucleotide pools [71] that can  
474 strongly influence nucleotide-dependent signaling. The thermodynamics and ki-  
475 netics of molecular signaling in such compartments can differ considerably from  
476 analogous processes in bulk solutions or in vitro. Myriad factors contribute to  
477 these differences, including smaller compartment volumes that strongly amplify  
478 substrate concentration gradients [30, 72], the presence of ‘crowders’ comprising  
479 other small molecules, protein or nucleic acid that generally impede diffusion [28,  
480 47, 73, 74], as well as rate enhancements typically exhibited for closely-apposed  
481 enzymes [29, 42, 45, 50, 75] or those adopting electrostatic fields complementary  
482 to a reacting species [38]. The relative contribution of these factors to coupled  
483 NDA activity in a given multi-cellular domain has not been examined previously  
484 and could ultimately determine the relative distribution of nucleotides. This  
485 balance of nucleotide concentrations determine the extent to which membrane  
486 bound, nucleotide receptors, ATPases and translocases are activated, that in  
487 turn can shape diverse cellular processes, including migration [76] and cytokine  
488 release [77].

489 To systematically probe the potential for these factors to impact NDA activ-  
490 ity and nucleotide distributions, we examined a sequential adenosine nucleotide

491 hydrolysis process as a model system for characterizing ecto-nucleotidase (NDA)  
492 activity within synapse-like domains. We performed steady-state reaction-diffusion  
493 simulations of two NDA enzymes that sequentially catalyze the hydrolysis pro-  
494 cesses  $ATP/ADP \rightarrow AMP \rightarrow Ado$ . Our system is modeled after the CD39 and  
495 CD73 NDAs, though we utilize two arbitrary, spherical representations that are  
496 selective for tri- and mono-phosphates, respectively, to generalize our results  
497 to other coupled nucleotidases. Additionally, although the fully deprotonated  
498 ATP anion assumes a charge of -4 [78], we assume in accordance with physio-  
499 logical systems that it is coordinated with magnesium [79] and thereby assumes  
500 a net negative charge of -2. To orient our results, we note that increasing  
501  $k_{on,ATP}$  rates (reaction of ATP at CD39) result in ADP accumulation, while  
502 large  $k_{on,AMP}$  and  $k_{prod,Ado}$  correspond to high rates of ADP consumption and  
503 AMP production at CD73. Since the latter rates are generally proportional to  
504  $k_{on,ATP}$ , we report the reaction efficiency,  $k_{eff} \equiv k_{prod,Ado}/k_{on,ATP}$ , to highlight  
505 contributions specific to ADP consumption. In this regard, high  $k_{eff}$  rates gen-  
506 erally reflect significant consumption of extant ADP pools to form AMP. These  
507 rates were measured for CD39 and CD73 in bulk solution and confined within  
508 a nanometer-diameter pore, for which we varied the enzyme distributions, sub-  
509 strate/enzyme interactions, as well as the nanopore surface charge to emulate  
510 typical phospholipid bilayers. Based on these variations, we discuss how the  
511 relative nucleotide composition within confined domains is determined by phys-  
512 ical attributes of the nanoscale compartment, how co-distribution of coupled  
513 hydrolysis reactions helps facilitate high reaction efficiency despite confinement  
514 to nanoscale, extracellular junctions, how membrane surface charge localizes  
515 substrates so as to accelerate reaction rates, indirectly modulate enzyme kinet-  
516 ics.

## 517 4.2 Nucleotide transport and distribution (pools) within 518 crowded extracellular junctions

519 We first discuss how nucleotide diffusion rates and distribution are influenced  
520 by physical attributes of the confined junctional geometry, including restricted  
521 diffusional volumes and electrostatic interactions between substrates, reactive  
522 enzymes and charged membrane surfaces. Independent of NDA activity, the  
523 restricted volume of the junction relative to the surrounding substrate reservoir,  
524 as well as the surface charge distribution within the junction, played key roles  
525 in shaping the nucleotide distribution. In our model, nucleotides entered the  
526 restrictive junctional domain from one of two reservoirs to emulate entrapment  
527 of species generated from an external source, such as ATP released from nearby  
528 damaged cells or part of physiological processes including paracrine release. In  
529 the absence of nucleotide/surface interactions, the diffusion rate of nucleotides  
530 through the junction decreases as its radius is reduced. This is easily rationalized  
531 by noting that the substrate flux through a cylinder normal to the nucleotide  
532 concentration gradient scaled proportionally to the cylinder's cross-sectional  
533 area relative to the reservoir surface area [80]. The constriction of the substrate-  
534 accessible volume at the junction opening leads to a substantial reduction in  
535 the amount of substrate available to the enzyme within the pore compared  
536 to bulk conditions (see also [51]). For this reason, narrow junctions between  
537 cells are anticipated to limit nucleotide pools available to ATPases and ATP-  
538 gated receptors localized to extracellular junctions. Hence, estimates of ATP  
539 based on bulk (extracellular) measurements [79] are generally unrepresentative  
540 of the local ATP pools formed within the compact interstitia between cells. This  
541 deviation strongly justifies the use of localized measurements of nucleotides when  
542 probing receptor activity in neural synapses for instance via microelectrodes [10].

### 543 4.3 Contribution of NDAs to controlling nucleotide pools

544 A secondary focus of this computational study was to probe NDA dependent  
545 modulation of steady-state nucleotide concentrations relative to those deter-  
546 mined by junction size and electrostatic charge alone. It is understood that  
547 NDAs rapidly degrade nucleotides released in synaptic junctions [81]; hence,  
548 pulsatile release of ATP from post-synaptic neurons is followed by transient,  
549 millisecond-scale upswings in the synaptic ATP concentration, owing to NDA  
550 degradation [10]. However, the femtoliter volume of such spaces [11] and inter-  
551 cell separations within several fold of the Debye length suggest that NDA ac-  
552 tivity and resulting nucleotide pools will be sensitive to NDA colocalization,  
553 strengths of substrate/enzyme electrostatic interactions and the junction vol-  
554 ume. Firstly, in analogy to the reduced nucleotide concentration reported at  
555 the junction/reservoir boundary, we observed substantially lower  $k_{on,ATP}$  rates  
556 for junction-confined CD39 relative to the bulk configuration. This behavior is  
557 easily rationalized by the smaller cross-section of the pore relative to an open  
558 system, which both reduces the concentration of substrate at the enzyme surface,  
559 as well as the accessibility of reactive enzyme surface. Further, our predictions  
560 are consistent with classic theoretical studies relating the dynamic accessibility  
561 of gated protein active sites or substrate tunnels to observed enzyme activ-  
562 ity [82], as demonstrated in acetylcholinesterase [83] and the PutA peripheral  
563 membrane flavoenzyme [84]. Since  $k_{prod,Ado}$  scales proportionally to  $k_{on,ATP}$ ,  
564 reduced NDA rates owing to confinement suggests that in vitro characterization  
565 of NDA activity in bulk media likely yield faster kinetics than would be expected  
566 for strongly confined systems; As a consequence, ATP pools within the junction  
567 were largely suppressed relative to those of the NDA-free system, while ADP  
568 and AMP were considerably larger. Based on these predictions, we anticipate  
569 that the degradation of adenosine phosphates to lower order molecules by ec-  
570 tonucleotidases proceeds more slowly in confined extracellular spaces relative to  
571 bulk conditions. Further, this reduction in reactivity is largely determined by  
572 the reaction rate of the first species, ATP.

573 In contrast to the consistent rate-limiting effect of enzyme confinement on  
574  $k_{on,ATP}$ , the efficiency of Ado production relative to bulk varied depending  
575 on the nature of substrate/membrane interactions. We investigated this de-  
576 pendency assuming reflective (non-interacting) and absorbing boundary condi-  
577 tions on the membrane; the latter is representative of nucleotide depletion by  
578 membrane-bound ATPases or translocases. We found that efficiency was maxi-  
579 mized when the nucleotides did not significantly interact with the membrane (re-  
580 flective). In this case, although CD39's confinement to the pore limited its access  
581 to ATP, the membrane prevented intermediate diffusion away from CD73. This  
582 established a relatively high intermediate concentration within the junction that  
583 in turn increased  $k_{prod,Ado}$ . In contrast, efficiency was strongly reduced when  
584 nucleotides were depleted at the surface (absorbing), as might be expected for  
585 significant nucleotide uptake by plasma membrane adenosine nucleotide translo-  
586 cases [66]. As discussed in the next section, this reduced efficiency for absorbing  
587 membranes could be countered by co-localizing the two-enzymes to favor AMP  
588 's reaction on CD73 relative to diffusing toward the membrane. Ultimately, these  
589 findings suggest that nucleotide pools capable of activating targets such as ADP  
590 sensitive P2Y channels will be strongly regulated by the relative activity of pro-  
591 teins or transporters that reduce the di-phosphate concentration in the junction  
592 and thereby compete with CD39.

593 Numerous biochemical processes that involve diffusing reactants rely on close  
594 spatial coupling of enzymes to promote efficient signaling. Examples of enzyme  
595 co-localization include formation of macro-molecular complexes [85, 86], confine-

596 ment in molecular ‘tunnels’ [87–89], the proximal reactive sites in the sulfate-  
597 activating complex [90], in addition to metabolic substrate channeling [91–93].  
598 We had thus expected that co-localizing NDAs within junctions would improve  
599 reaction efficiency. However, we found that close spatial coupling was advanta-  
600 geous only when the junction membrane significantly interacted with the inter-  
601 mediate. Specifically, when the membrane either absorbed the intermediate or  
602 attracted the intermediate through attractive electrostatic interactions, smaller  
603 concentration gradients were evident at CD73 and thereby reduced  $k_{on,AMP}$ .  
604 Co-localizing CD39 and CD73 minimized the intermediate’s access to the mem-  
605 brane and thus facilitated faster  $k_{on,AMP}$  rates than were evident at larger en-  
606 zyme separations. This behavior is consistent with simulation studies by us and  
607 others [19, 45, 82] for open (bulk) systems whereby co-localization of sequen-  
608 tial enzymes can enhance reaction rates. Based on our rationalization in the pre-  
609 ceding paragraph, co-localization of CD39 and CD73 for a reflective membrane  
610 had minimal impact on the reaction efficiency, given that the intermediate had  
611 limited capacity to escape the reactive sites. Constructs including micelle- or  
612 viral capsid-based nanoreactors that house enzymes, or enzymes immobilized  
613 to linear or planar molecular assemblies [56, 94] exhibit analogous increases in  
614 efficiency through mitigating loss of intermediates to open boundaries. These  
615 results therefore suggest that variations in NDA co-localization could provide  
616 a means to tune the relative composition of nucleotide pools within junctions,  
617 particularly for charged membranes or those with an abundance of proteins that  
618 compete for nucleotides.

619 A central contribution from our study is to confirm the significant role of  
620 electrostatics and intermediate channeling in facilitating coupled nucleotide hy-  
621 drolysis reactions catalyzed by NDAs in nanoscale volumes. Secondly, we  
622 demonstrate that tuning of the surface/enzyme and surface/substrate interac-  
623 tions can further optimize reaction rates. A third contribution of our study was  
624 to systematically characterize how electrostatic interactions influence enzyme  
625 kinetics under physiological conditions. It is clear from our simulation data  
626 that a significant membrane charge can redistribute the populations of charged  
627 substrates along the pore boundaries. Because diffusion-limited reaction rates  
628 scale proportional to the substrate concentration gradient at the enzyme ac-  
629 tive site, it was expected that membrane charge configurations that localized  
630 substrates to the pore and its surface would enhance the reaction rate.

631 From this standpoint, we can treat our predicted  $k_{on,ATP}$  values as readouts  
632 for the significance of local substrate concentrations to NDA activity, particu-  
633 larly in the context of electrostatic interactions. Such electrostatic interactions  
634 have been speculated to contribute to the formation of ‘micro-domains’ local-  
635 ized to the membrane surface, such as for  $Ca^{2+}$ ,  $Na^+$  and to a lesser extent  
636 [58, 72, 95, 96] following transient fluctuations in their concentrations. These  
637 microdomains are strongly implicated in modulating the ion-dependent activa-  
638 tion of small proteins [97]. As an example, ATP has been suggested to assume  
639 concentrations several-fold higher than the bulk cytosol, based on modeling and  
640 ATPase enzyme assays [30, 93]. To the extent that the microdomains arise ex-  
641 clusively from electrostatic interactions, microdomain effects would be expected  
642 to be maximal within the membrane’s electric double layer that is approximately  
643 1 nm at physiological ionic strength.

644 Therefore we sought to examine extent to which electrostatic interactions  
645 contribute to microdomains under steady state conditions. We found that the  
646 reaction rate coefficient had weak dependence on the enzymes’ distance from the  
647 pore surface, regardless of ionic strength, which strongly suggests microdomains  
648 arise from a different basis. Consistent with this argument is our recent finding  
649 that ionic-strength-dependent changes in the  $Ca^{2+}$  at the membrane surface



650 has negligible impact on SERCA  $\text{Ca}^{2+}$  affinity [98]. This confirms that localized  
651 substrate pools near the surface stem from non-equilibrium conditions, namely  
652 a net flux of substrate from the extracellular or cytosolic domains toward the  
653 membrane. For ATP, the steady-state flux toward the cytosolic side of the mem-  
654 brane could arise from the creatine and adenylate kinase shuttles [30, 93], while  
655 localized ATP gradients on the extracellular side could result from F10ATPase  
656 or translocase activity [8]. For ions such as  $\text{Ca}^{2+}$ , membrane-localized gradients  
657 could arise from small inward fluxes of plasma membrane currents or leak from  
658 compartments such as the endoplasmic reticulum [97].

659 Our results suggest that the predominant effect of charging the membrane  
660 is to increase the concentration of ATP within the entire pore interior. This  
661 was evident in the predicted ATP concentration profile within the pore (see  
662 Fig. S1), which varied significantly from the bulk reservoirs. This raises an  
663 interesting possibility that NDA activity could be modulated through controlling  
664 the surface charge by varying membrane lipid composition. Such variations in  
665 lipid composition and surface charge are known to occur during phagocytosis  
666 [99] and within neural synapses [67].

667 In addition to substrate/surface interactions, we demonstrate that electro-  
668 static interactions between nucleotide substrates and their enzymes targets ac-  
669 celerate NDA activity. Favorable long-range electrostatic interactions between  
670 enzymes and substrates are well known to optimize diffusion-limited reactions in  
671 biological systems [63]. Chiefly, enzymes that bear charges complementary to  
672 their substrates typically exhibit reaction rates that are several orders of mag-  
673 nitude higher than rates observed with neutral species or at high ionic strengths  
674 that shield electrostatic interactions [51]. We specifically address this for CD39,  
675 CD73 and charged membranes. CD39, for example, appears to have a slightly  
676 greater density of positively-charged amino acids near the nucleotide binding  
677 domain. We would expect this positive charge center to enhance the associ-  
678 ation rate via complementary electrostatic interactions through Arg56, Lys79,  
679 Lys80, and Lys82. This was determined by visual inspection of the electrostatic  
680 potential of a representative CD39 structure, the NTPDase2 from *Legionella*  
681 *pneumophila* (PDB code 4BR7 [24]) using the Adaptive Poisson Boltzmann  
682 Solver APBS[100]. Hence we expect this to facilitate the rapid reaction, though  
683 to our knowledge rates with respect to ionic strength for this enzyme have not  
684 been reported.

685 Beyond the role of electrostatics in shaping  $k_{on,ATP}$ , our results demonstrate  
686 the kinetic advantage of co-localizing charged enzymes. When the enzymes  
687 were co-localized, the influence of electrostatic interactions on the reaction rates  
688 were most strongly evident, with the fastest rates reported for closely-opposed  
689 enzymes that adopt surface charges complementary to their substrates. This  
690 finding mirrors trends observed in other coupled enzymatic processes; namely  
691 in the event that enzymes or reactive sites are sequentially aligned for cou-  
692 pled enzymatic reactions, electrostatic channeling of substrates is commonly  
693 exploited in nature to optimize the rate or efficiency of substrate conversion [75,  
694 101, 102]. As an example, a computational study of the DHFR-TS enzyme in  
695 prokaryotes has revealed that tetrahydrofolate production rates are accelerated  
696 by a patch of positively-charged amino acids between the thymidylate synthase  
697 and dihydrofolate reductase reactive sites, which facilitate transfer of the an-  
698 ionic dihydrofolate intermediate [21]. Significantly, when the enzymes' charges  
699 were complementary to those of the reactants, the overall reaction efficiency ex-  
700 ceeded predictions for the uncharged, confined enzymes and the enzymes in bulk  
701 solution. Hence, these variations should profoundly influence the dynamics and  
702 relative distribution of nucleotides within extracellular junctions.



#### 703 4.4 Limitations and Future directions

704 In order to work with the system that was numerically solvable, we made several  
705 assumptions. Firstly, we assumed all enzymatic reactions were fast compared to  
706 the diffusion of nucleotides between reactive centers. NDAs are known to rapidly  
707 manage nucleotide pools with reaction rates on the order of  $1 \mu\text{M s}^{-1}$  [31]. Since  
708 the intrinsic reaction rates of these enzymes vary quite considerably depending  
709 on the isoform and cell type, we assumed reaction-limited conditions for simplic-  
710 ity and generality. It may also be appropriate to consider feedback inhibition,  
711 given evidence that productions can hinder NDA-catalyzed AMP hydrolysis.  
712 We additionally assumed spherical shapes for the proteins; while this may seem  
713 to miss important details, our previous studies have indicated that the native  
714 structure of the proteins has a marginal influence on reaction dynamics [52].  
715 We additionally assumed constant membrane potentials, although this can be  
716 expected to vary in real lipid systems such as during phagocytosis [99]. We addi-  
717 tionally considered all reactions to be in steady state for ease of simulation and  
718 analysis for simplicity, though effects of micro domains expected to be most evi-  
719 dent under non-linear, non-steady state conditions that permit significant ATP  
720 accumulation. We also limited our membrane potentials to modest ranges for  
721 which the linearized Poisson-Boltzmann equation was appropriate. For stronger  
722 potentials, the full PB equation would be more appropriate but also more com-  
723 putationally expensive [103]. Further, in highly charged and confined domains,  
724 the diffusing substrate can be expected to contribute to the shielding of electric  
725 charge, which advocates for the use of the Poisson-Nernst-Planck formalism (see  
726 [51]).

727 Although the enzyme and pore representations were simplistic in this study,  
728 our finite element modeling approach can be refined with detailed structural  
729 models of enzymes and their cellular environment. As an example, we have pre-  
730 viously used finite element models to probe  $\text{Ca}^{2+}$  binding rates to myofilament  
731 proteins bound to actin chains [52, 53, 104] at atomic resolution, using mesh  
732 building software [105] applied to structures found in the Protein Databank.  
733 A similar approach could be used to probe the dynamics of other enzyme-  
734 catalyzed reactions in detailed molecular environments, such as those based  
735 on atomistic-resolution simulations of a crowded cytoplasm [106]. Along these  
736 lines, simulations of NDA activity in crowded synapses are warranted.

#### 737 5 Conclusions

738 Sequentially-coupled enzymatic processes have been extensively probed in the  
739 literature. Our contribution in this paper complement these studies through  
740 offering insights into nucleotide distributions and NDA activity within extracel-  
741 lular junctions. Our results are consistent with the well-established notions of  
742 electrostatic channeling for accelerating reaction rates and for the benefits of co-  
743 localization. Our approach is unique in its basis in a finite-element framework  
744 that allows for the direct incorporation of electron or confocal microscopy data,  
745 such as for serial block images of neurons or neuromuscular junctions [107], or  
746 for atomistic resolution molecular structures of NDAs. In order to generalize  
747 our results, we utilized a simplified pore/spherical enzyme framework for which  
748 we could easily vary system parameters such as distances and radii, which could  
749 not be afforded with structurally detailed models. Based on our earlier studies,  
750 while details of the surface charge density of an active site can influence reaction  
751 rates, nuances of the protein structure generally do not substantially impact the  
752 results. This can be easily seen in our plots, which show relatively small changes  
753 in reactivity and efficiency as a function of significant changes in enzyme sizes

754 or separation distances. This observation is helpful in reducing the spatial com-  
755 plexity of reaction simulations in complex media. As we demonstrated in [23],  
756 effective diffusion rates of small molecules in structurally-realistic crowded so-  
757 lutions did not significantly differ from those computed using perfect spheres of  
758 fixed radii at a similar packing fraction. This is in agreement with [52, 104, 108].  
759 As shown in our results, this permits the contributions of crowders to diffusion-  
760 limited association rates to be accounted for in a rather simple implicit form,  
761 namely by accounting for configurational entropy of the reacting substrate.

762 These simulations of steady-state NDA nucleotide hydrolysis activity in  
763 nanoscale porous geometry mimic gap junctions between cells. We found that  
764 confinement and high charge densities within confined domains alter nucleotide  
765 concentrations relative to bulk, independent of NDA activity. Additionally, we  
766 demonstrate that for NDAs localized to the pore, confinement of NDA reduces  
767 activity relative to bulk, and the nature of surface interactions determines the  
768 advantage of co-localization on reaction efficiency. Of these, charges substan-  
769 tially influence reaction kinetics, particularly contributions of complementary  
770 membrane charge to ATP in the initial reaction.

771 We believe these findings provide new insights into the activity of purinergic  
772 receptors and other proteins that respond to extracellular ATP concentrations.  
773 Incorporating these features could expand our capacity to probe physiological  
774 phenomena *in vivo*, monitor and tailor drug delivery kinetics (reviewed in [109]),  
775 and engineer biosynthetic pathways, especially those utilizing immobilized en-  
776 zymes [44, 91, 110]. Additional future directions include probing reaction dy-  
777 namics relative to enzyme activity. We could further compare how the dynamic  
778 nucleotide signals influence the activity of purinergic receptors and ATPase ac-  
779 tivity on the extracellular domain, like  $F_1-F_0$  ATP synthase[8].

## 780 6 Acknowledgements

781 Research reported in this publication was supported by the Maximizing Invest-  
782 igators' Research Award (MIRA) (R35) from the National Institute of General  
783 Medical Sciences (NIGMS) of the National Institutes of Health (NIH) under  
784 grant number R35GM124977. We further acknowledge support from the Amer-  
785 ican Chemical Society Petroleum Research Fund 58719-DN16. This work used  
786 the Extreme Science and Engineering Discovery Environment (XSEDE) [111],  
787 which is supported by National Science Foundation grant number ACI-1548562.

## 788 7 Method

### 789 7.1 Overview

790 The purpose of this study is to understand the steady-state properties of nu-  
791 cleotide hydrolysis by NDAs in nanoscale extracellular domains. This was  
792 achieved through computer simulations of electrokinetic transport, similar to  
793 those in [51], modified to handle reaction equilibria. The theoretical model  
794 includes partial differential equations defined on a continuum problem domain.  
795 These equations are solved numerically using the Finite Element Method. Steady-  
796 state conditions were assumed. The equations were solved for three-dimensional  
797 geometries resembling the porous materials in [51, 80]. Rather than attempting  
798 to simulate the intricate geometries of *in vivo* systems, the geometry of these  
799 porous materials was chosen in order to reduce the computational cost of the  
800 simulations, simplify interpretation of the results, and improve the reproducibil-  
801 ity of our findings. The porous material is modeled as a thin membrane sepa-

802 rating two aqueous reservoirs. A concentration gradient can be created between  
803 the two reservoirs to drive transport across the membrane. The simulations  
804 study diffusion taking place inside circular pores in the membrane. The compu-  
805 tational model allows for the control of key geometric, electrostatic, and kinetic  
806 parameters, so that the effects of various phenomena can be resolved. Predicted  
807 substrate gradients that develop in the materials were used to estimate reac-  
808 tion rate coefficients, which directly relate to the kinetics of substrate transport.  
809 Additional physics was enabled in the computational model that accounted for  
810 electrostatic interactions and surface reactions. Chief outcomes of this study are  
811 1) a computational model for molecular transport and 2) quantitative data for  
812 describing how confined domains and electrostatic interactions control molec-  
813 ular transport. For comparisons against bulk conditions, we assumed enzyme  
814 densities corresponding to millimolar concentrations.

## 815 7.2 Theory

816 In these simulations, the enzymes are held in fixed positions while the substrates  
817 are allowed to diffuse. The problem domain is approximated as a continuum,  
818 with the diffusing chemical species considered to be point particles. Under these  
819 circumstances, the reaction encounter distance is just the radius of the enzyme.  
820 The enzymes are therefore approximated as spheres.

Three species of substrate are included: A, AMP, and Ado. ATP is converted to the AMP product when it encounters the surface of CD39, followed by AMP's conversion to adenosine on enzyme CD78:

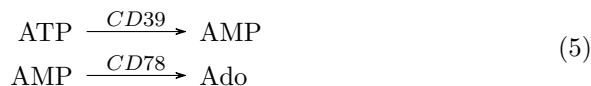

821 We define the concentration of a given species S as  $c_S$ , which is an unknown  
822 spatial function to be found by solving the governing diffusion equation. The  
823 ion flux of species S is a vector field,  $\vec{j}_S$ , related to the change in concentration  
824 with respect to time through a continuity equation,

$$\frac{\partial c_S}{\partial t} = -\nabla \cdot \vec{j}_S \quad (6)$$

825 The diffusion of ions in a fixed electrostatic field is described by the Smolu-  
826 chowski equation [112], where the flux includes both a Fickian diffusion term  
827 and a term due to the electrostatic force:

$$\vec{j}_S = -D_S (\nabla c_S + \beta z_S c_S \nabla \Phi) \quad (7)$$

828 Where  $z_S$  is the electric charge of species S,  $\Phi$  is the electric potential as a  
829 scalar field,  $D_S$  is the Fickian diffusion coefficient for species S in the relevant  
830 media, and  $\beta$  is  $1/k_B T$  for temperature  $T$  and Boltzmann constant  $k_B$ . In this  
831 equation, the diffusion coefficient is assumed to be homogeneous and isotropic.

832 Using this flux in the continuity equation, the Smoluchowski equation can  
833 be written as:

$$\frac{\partial c_S}{\partial t} = \nabla \cdot (D_S (\nabla c_S + \beta z_S c_S \nabla \Phi)) \quad (8)$$

Under steady state conditions the concentration of species S does not vary in time, and so the governing differential equation is:

$$0 = \nabla \cdot (D_S (\nabla c_S + \beta z_S c_S \nabla \Phi)) \quad (9)$$

834 To reduce the computational burden, an alternate form of the Smoluchowski

835 equation is used. The substrate flux is expressed as:

$$\vec{j}_S = -D_S e^{-\beta z_S \Phi} \nabla (e^{\beta z_S \Phi} c_S) \quad (10)$$

836 The equivalence of these two expressions for the flux can be readily verified  
837 using the product rule for gradients. The advantage of this alternate form is  
838 that it allows for the application of the Slotboom transformation [113] [114]:

$$\begin{aligned} \bar{D}_S &= D_S e^{-\beta z_S \Phi} \\ \bar{c}_S &= c_S e^{\beta z_S \Phi} \end{aligned} \quad (11)$$

839 After applying this transformation, the Smoluchowski equation is expressed  
840 in a form analogous to a simple Fickian diffusion equation:

$$\nabla \cdot (\bar{D}_S \nabla (\bar{c}_S)) = 0 \quad (12)$$

841 Equation 12 must be solved for each species.

842 We also define the integrated flux over any surface  $\Gamma$  as

$$J_S = \int_{\Gamma} \vec{j}_S \cdot \hat{n} d\Gamma \quad (13)$$

843 where  $\hat{n}$  is the unit normal to the surface  $\Gamma$ .

The reaction kinetics at an enzyme are assumed to follow a simple rate law. For the reactions in Equation 5, the rate laws are given by

$$\begin{aligned} -J_{ATP} &= J_{AMP} = k_{CD39} c_{ATP} \\ -J_{AMP} &= J_{Ado} = k_{CD73} c_{AMP} \end{aligned} \quad (14)$$

844 which defines reaction rate coefficients  $k_{CD39} = k_{on,ATP} = k_{prod,AMP}$  and  
845  $k_{CD73} = k_{on,AMP} = k_{prod,Ado}$ .

846 The calculation procedure begins by solving Equation 12 for  $\bar{c}$  for each  
847 species, then computing the flux vector fields from the Slotboom transformation  
848 of Equation 7, then integrating the flux over the enzyme surface, and using the  
849 integrated flux to calculate the rate coefficient. The rate laws of Equation 14  
850 are enforced at each enzyme by requiring that  $\vec{j}_{ATP} \cdot \hat{n} = -\vec{j}_{AMP} \cdot \hat{n}$  on the  
851 surface of CD39, and  $\vec{j}_{AMP} \cdot \hat{n} = -\vec{j}_{Ado} \cdot \hat{n}$  on the surface of CD73.

852 A summary of concentration boundary conditions applied to the model is  
853 presented in Table 1.

| Boundary Surface | $\Gamma_{CD39}$      | $\Gamma_{CD73}$      | $\Gamma_R$      | $\Gamma_L$    |
|------------------|----------------------|----------------------|-----------------|---------------|
| Substrate ATP    | $c_{ATP} = 0$        | $j_{ATP} = 0$        | $c_{ATP} = C_0$ | $c_{ATP} = 0$ |
| Substrate ADP    | $j_{AMP} = -j_{ATP}$ | $c_{AMP} = 0$        | $c_{AMP} = 0$   | $c_{AMP} = 0$ |
| Substrate Ado    | $j_{Ado} = 0$        | $j_{Ado} = -j_{AMP}$ | $c_{Ado} = 0$   | $c_{Ado} = 0$ |

Table 1: Concentration boundary conditions for the nanoporous system. Bound-  
ary conditions on  $\Gamma_P$  vary. Here,  $j_S = \vec{j}_S \cdot \hat{n}$ .

854 The solution of Equation 12 requires knowledge of the electric potential  $\Phi$   
855 throughout the model. The electric potential is found by solving the linearized  
856 Poisson-Boltzmann equation:

$$\nabla^2 \Phi = \kappa^2 \quad (15)$$

857 where  $\kappa$  is ionic strength which is the inverse of the Debye length. For pure  
858 aqueous solvent,  $\kappa = 0$  and therefore Eq. 15 reduces to the Poisson equation  
859 commonly used in electrostatics.

### 860 **7.3 Numerical approach**

861 Methodologies are generally as described in Sun et al., [51].

862 The system of partial differential equations and boundary conditions de-  
863 scribed above was solved numerically using the Finite Element Method. The  
864 open-source finite element package FEniCS[115], version 2017.2.0 was used to  
865 conduct the simulations. This software is publicly available at [fenicsproject.org](http://fenicsproject.org).

866 A second-order polynomial (Lagrange) basis set was used for all finite ele-  
867 ments. The differential equations to be solved were all linear, so no nonlinear  
868 solution schemes were required. Various linear solvers and preconditioners were  
869 employed in order to obtain solutions.

870 Python-based analysis routines were used to set up, solve, and post-process  
871 the finite element models. All code written in support of this publication is  
872 publicly available at <https://bitbucket.org/pkhlab/pkh-lab-analyses>. Simula-  
873 tion input files and generated data are available upon request.

874 **Supplement**

875 **S Supplementary Information (SI): Co-localization**  
876 **and confinement of ecto-nucleotidases modu-**  
877 **late extracellular adenosine nucleotide pools**

878 Rahmaninejad\*<sup>1</sup>, Pace\*<sup>1</sup>, Bhatt<sup>2</sup>, Sun<sup>2</sup> and Kekeneshuskey<sup>2,3</sup>

879 <sup>1</sup> Department of Physics, <sup>2</sup> Department of Chemistry, <sup>3</sup> Department of  
880 Chemical and Materials Engineering, University of Kentucky, Lexington, KY,  
881 USA 40506

882 \* Corresponding authors. E-mail address: pkeneshuskey@uky.edu (P.  
883 Kekeneshuskey)

884 **S.1 Tables**

| Fig (Sect)  | qA/EA | qB/Eb  | Pore | Crowders | $\lambda_D$ |
|-------------|-------|--------|------|----------|-------------|
| Fig. ?? (1) | -1/0  | +1/0   | 0    | 0        |             |
| 2           | -1/+1 | +1/-1  | var. | 0        | ?           |
| 3           | -1/0  | +1/0   | 0    | var.     | ?           |
| Fig. ??c    | -1/0  | var./0 | 0    | var.     |             |

Table S1: Summary of cases run

885 **S.2 Figures**

Fig. S1

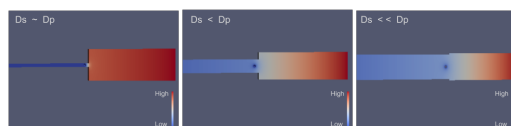

Figure S1: Concentration profile for three different values of pore radius.

886

Fig. S2

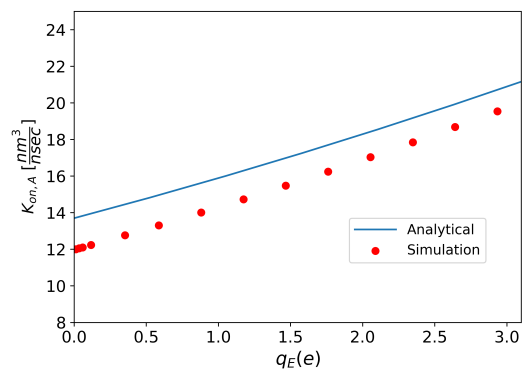

Figure S2: A comparison between theoretical (see Eq. 2 ) and simulation result which validates our model of simulation. .

887



Fig. S3

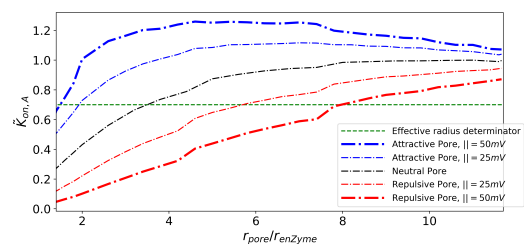

Figure S3: Effective pore radius for larger relative size of the pore to enzyme radius. .

888

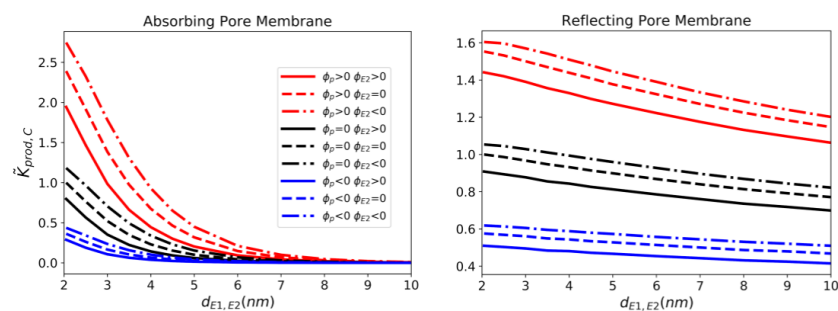

Figure S4: **Effects of charge** Effect of charge sign composition on reactivity, given  $z_{ATP}=-1$ ,  $z_{AMP}=+1$ ,  $z_{Ado}=0$  and  $\Phi_{CD39} > 0$  Normalized reaction rate coefficient for production of Ado as a function of distance between enzymes. .

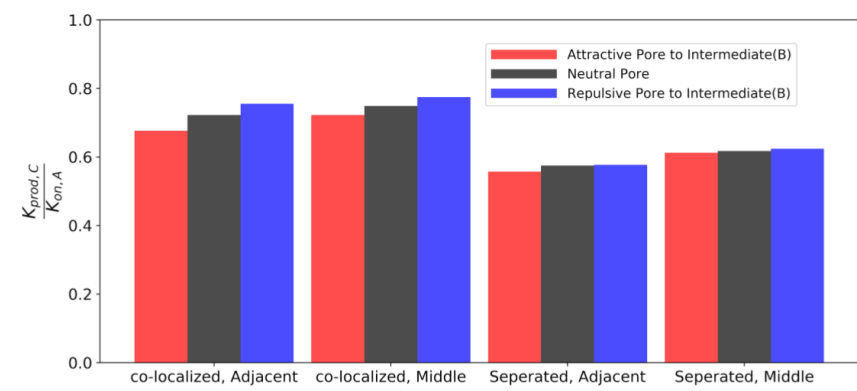

Figure S5: **Effects of charge** Efficiency of sequential enzymes for different pore wall electric potentials, given  $z_{ATP}=-1$ ,  $z_{AMP}=+1$ ,  $z_{Ado}=0$  and  $\Phi_{CD39} > 0$

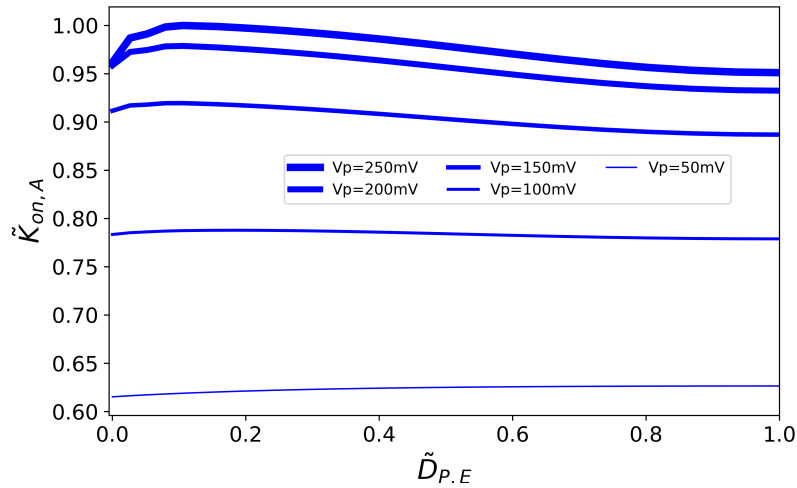

Figure S6: For large potential of the pore in comparison with enzyme potential, as the enzyme get close to the pore membrane, due to the attraction between pore membrane and substrate ATP the concentration of ATP is more and so it leads to an increase to the reactivity of enzyme. However, when the enzyme is getting too closer to the pore membrane, the competition between pore membrane and enzyme, especially for very large potential on membrane, is increasing, leading to a sudden decrease in reactivity. This obtained for  $\kappa=1$ , and  $D_p=5D_E$ .

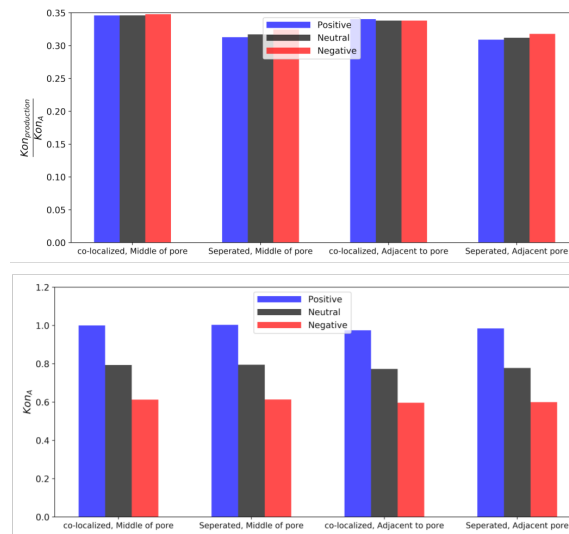

Figure S7: **Coloc/tethering effects on keff.** These data obtained for the case which maximize the efficiency with  $VE1 > 0$ ,  $VE2 < 0$ ,  $Dp=8$  and  $Vp=25mV$ . The  $konA$  does not change when enzymes get close to the wall for all different charges of the pore wall. However, I have tried a case when  $Dp=11$ ,  $kappa=1$  and  $Vp=100$  and saw that the  $konA$  increase as the enzymes get close tho the wall for attractive case between species ATP and pore wall (here positive), although the difference is not considerable(around 1.5 percent change). There is two factors affecting  $konA$  when it get close to the wall: The capacitance change when the enzyme get close to the wall. However, the concentration of ATP species is more near the wall of the pore. .

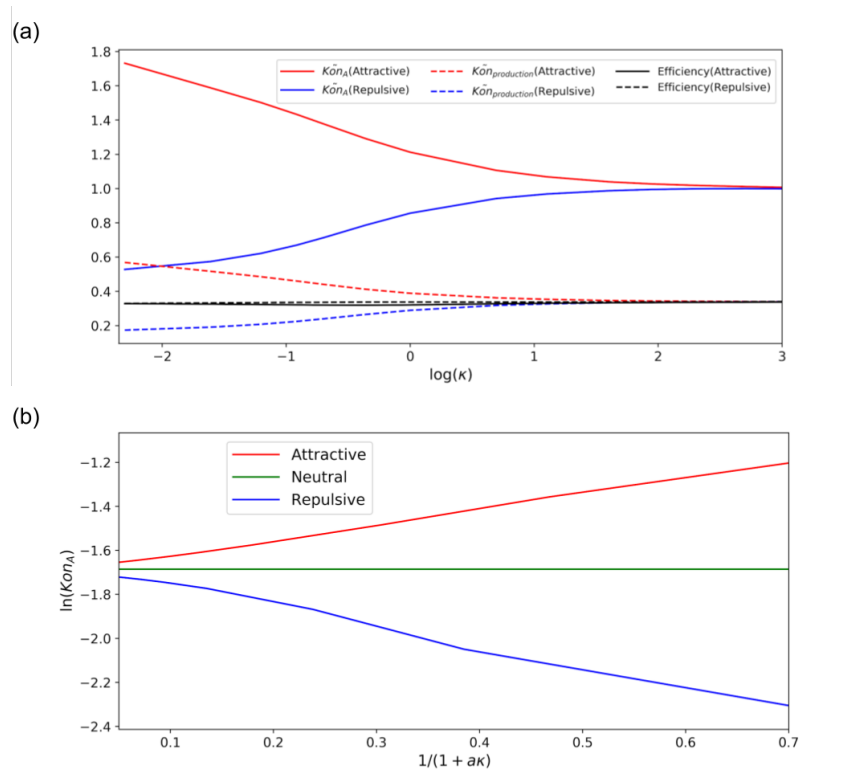

Figure S8: **Effect of Debye Length on reactivity of sequential enzyme:**  
 a) Reactivity of the first enzyme and second enzyme as a function of pore to enzyme distance for electrostatical compositions with maximum (red) and minimum (blue) reactivity along with the efficiency (black) c) b) effective pore radius based on potential of the pore and Debye length. The green curve shows the data for uncharged reactivity of the first enzyme as a function of real physical size. based on the data we obtained from charged simulation, we can match an effective pore size which for attractive is bigger and for repulsive is less than its real size. .

## References

- 889
- 890 [1] M. Vendelin and R. Birkedal. “Anisotropic diffusion of fluorescently labeled ATP in rat cardiomyocytes determined by raster image correlation spectroscopy”. In: *AJP Cell Physiol.* 295.5 (2008), pp. C1302–C1315.
- 891
- 892
- 893 [2] A. P. A. P. Somlyo and A. V. A. V. Somlyo. “Signal transduction and regulation in smooth muscle.” In: *Nature* 372.6503 (1994), pp. 231–236.
- 894
- 895 [3] S. S. Shen-Orr et al. “Network motifs in the transcriptional regulation network of *Escherichia coli*.” In: *Nature Genetics* 31.1 (2002), p. 64. ISSN: 10614036.
- 896
- 897
- 898 [4] E. H. Davidson et al. “A genomic regulatory network for development”. In: *Science (New York, N.Y.)* 295.5560 (Mar. 2002). Date completed - 2002-03-27; Date created - 2002-03-02; Date revised - 2018-01-05; Last updated - 2018-01-16, pp. 1669–1678.
- 899
- 900
- 901
- 902 [5] P. A. Srere. “COMPLEXES OF SEQUENTIAL METABOLIC ENZYMES”. In: *Annual Review of Biochemistry* 56.1 (1987). PMID: 2441660, pp. 89–124.
- 903
- 904
- 905 [6] R. A. North. “Molecular Physiology of P2X Receptors”. In: *Physiol. Rev.* 82.4 (2002), pp. 1013–1067.
- 906
- 907 [7] I. von Kugelgen and K. Hoffmann. “Pharmacology and structure of P2Y receptors”. In: *Neuropharmacology* 104 (2016), pp. 50–61. ISSN: 00283908.
- 908
- 909 [8] T. A. Ashley et al. “Endothelial cell surface F1-FO ATP synthase is active in ATP synthesis and is inhibited by angiostatin”. In: *Proc. Natl. Acad. Sci.* 98.12 (2002), pp. 6656–6661. ISSN: 0027-8424.
- 910
- 911
- 912 [9] B. S. Khakh. “Molecular physiology of P2X receptors and ATP signalling at synapses”. In: *Nat. Rev. Neurosci.* (2001).
- 913
- 914 [10] U. Lalo et al. “Exocytosis of ATP From Astrocytes Modulates Phasic and Tonic Inhibition in the Neocortex”. In: *PLoS Biol.* 12.1 (2014), e1001747.
- 915
- 916 [11] H. Bito. “The chemical biology of synapses and neuronal circuits”. In: *Nat. Chem. Biol.* 6.8 (2010), pp. 560–563. ISSN: 1552-4450.
- 917
- 918 [12] S. Deaglio and S. C. Robson. “Ectonucleotidases as Regulators of Purinergic Signaling in Thrombosis, Inflammation, and Immunity”. In: 61 (2011), pp. 301–332. ISSN: 1557-8925.
- 919
- 920
- 921 [13] H. ZIMMERMANN. “BIOCHEMISTRY, LOCALIZATION AND FUNCTIONAL ROLES OF ECTO-NUCLEOTIDASES IN THE NERVOUS SYSTEM”. In: *Prog. Neurobiol.* 49.6 (1996), pp. 589–618.
- 922
- 923
- 924 [14] A. L. Giuliani, A. C. Sarti, and F. Di Virgilio. “Extracellular nucleotides and nucleosides as signalling molecules”. In: *Immunol. Lett.* 205 (2019), pp. 16–24. ISSN: 01652478.
- 925
- 926
- 927 [15] M. K. Aliev and A. N. Tikhonov. “Random walk analysis of restricted metabolite diffusion in skeletal myofibril systems.” In: *Mol. Cell. Biochem.* 256-257.1-2 (2004), pp. 257–66. ISSN: 0300-8177.
- 928
- 929
- 930 [16] M. Aliev et al. “Molecular System Bioenergetics of the Heart”. In: *Int. J. Mol. Sci.* 12.12 (2011), pp. 9296–9331.
- 931
- 932 [17] F. Kukulski, S. A. Levesque, and J. Sevigny. “Impact of Ectoenzymes on P2 and P1 Receptor Signaling”. In: 61 (2011), pp. 263–299. ISSN: 1557-8925.
- 933
- 934

- 935 [18] J. J. Tyson and B. Novak. “Functional Motifs in Biochemical Reaction  
936 Networks”. In: *Annual Review of Physical Chemistry* 61.1 (2010). PMID:  
937 20055671, pp. 219–240.
- 938 [19] C. Eun et al. “A model study of sequential enzyme reactions and elec-  
939 trostatic channeling”. In: *J. Chem. Phys.* 140.10 (2014), p. 105101. ISSN:  
940 0021-9606.
- 941 [20] N. Yamaguchi et al. “Modulation of sarcoplasmic reticulum Ca<sup>2+</sup> re-  
942 lease in skeletal muscle expressing ryanodine receptor impaired in regu-  
943 lation by calmodulin and S100A1”. In: *Am. J. Physiol. Physiol.* 300.5  
944 (2011), pp. C998–C1012.
- 945 [21] V. Metzger et al. “Electrostatic channeling in *P. falciparum* DHFR-TS:  
946 Brownian dynamics and smoluchowski modeling”. In: *Biophys. J.* 107.10  
947 (2014), pp. 2394–2402. ISSN: 15420086 00063495.
- 948 [22] N. Dorsaz et al. “Diffusion-limited reactions in crowded environments”.  
949 In: *Phys. Rev.* (2010), p. 2012.
- 950 [23] P. M. Kekenés-Huskey, C. E. Scott, and S. Atalay. “Quantifying the  
951 Influence of the Crowded Cytoplasm on Small Molecule Diffusion”. In:  
952 *J. Phys. Chem. B* 120.33 (2016), pp. 8696–8706. ISSN: 1520-6106.
- 953 [24] M. Zebisch et al. “Crystallographic snapshots along the reaction path-  
954 way of nucleoside triphosphate diphosphohydrolases.” In: *Structure* 21.8  
955 (2013), pp. 1460–75. ISSN: 1878-4186.
- 956 [25] S. P. Zustiak, R. Nossal, and D. L. Sackett. “Hindered Diffusion in Poly-  
957 meric Solutions Studied by Fluorescence Correlation Spectroscopy”. In:  
958 *Biophys. J.* 101.1 (2011), pp. 255–264.
- 959 [26] D. Ridgway, G. Broderick, and A. Lopez-Campistrous. “Coarse-grained  
960 molecular simulation of diffusion and reaction kinetics in a crowded vir-  
961 tual cytoplasm”. In: *Biophys. J.* (2008), pp. 1–2.
- 962 [27] H. W. Qi et al. “The Effect of Macromolecular Crowding on the Electro-  
963 static Component of Barnase-Barstar Binding”. In: ().
- 964 [28] J. A. Dix and A. S. Verkman. “Crowding Effects on Diffusion in Solutions  
965 and Cells”. In: *Annu. Rev. Biophys.* 37.1 (2008), pp. 247–263.
- 966 [29] P. M. Kekenés-Huskey, C. Eun, and J. A. McCammon. “Enzyme local-  
967 ization, crowding, and buffers collectively modulate diffusion-influenced  
968 signal transduction: Insights from continuum diffusion modeling”. In: *J.*  
969 *Chem. Phys.* 143.9 (2015), p. 094103. ISSN: 0021-9606.
- 970 [30] A. E. Alekseev et al. “Compartmentation of membrane processes and nu-  
971 cleotide dynamics in diffusion-restricted cardiac cell microenvironment.”  
972 In: *J. Mol. Cell. Cardiol.* 52.2 (2012), pp. 401–409.
- 973 [31] C. I. Sandefur, R. C. Boucher, and T. C. Elston. “Mathematical model  
974 reveals role of nucleotide signaling in airway surface liquid homeostasis  
975 and its dysregulation in cystic fibrosis”. In: *Proc. Natl. Acad. Sci.* 114.35  
976 (2017), E7272–E7281. ISSN: 0027-8424.
- 977 [32] A. H. Elcock. “Models of macromolecular crowding effects and the need  
978 for quantitative comparisons with experiment”. In: *Curr. Opin. Struct.*  
979 *Biol.* 20.2 (2010), pp. 196–206.
- 980 [33] D. Chen et al. “MIBPB: A software package for electrostatic analysis”.  
981 In: *J. Comput. Chem.* 32.4 (2010), pp. 756–770.



- 982 [34] A. Arkin and J. Ross. “Computational functions in biochemical reaction  
983 networks”. In: *Biophysical Journal* 67.2 (1994), pp. 560–578. ISSN: 0006-  
984 3495.
- 985 [35] H. Jeong et al. “The large-scale organization of metabolic networks.” In:  
986 *Nature* 407.6804 (2000), p. 651. ISSN: 00280836.
- 987 [36] G. Shinar and M. Feinberg. “Structural Sources of Robustness in Bio-  
988 chemical Reaction Networks”. In: *Science* 327.5971 (2010), pp. 1389–  
989 1391. ISSN: 0036-8075.
- 990 [37] J. A. Papin, J. L. Reed, and B. O. Palsson. “Hierarchical thinking in  
991 network biology: the unbiased modularization of biochemical networks”.  
992 In: *Trends in Biochemical Sciences* 29.12 (2004), pp. 641–647. ISSN: 0968-  
993 0004.
- 994 [38] G. Schreiber, G. Haran, and H. X. Zhou. “Fundamental Aspects of  
995 Protein-Protein Association Kinetics”. In: *Chem. Rev.* 109.3 (2009), pp. 839–  
996 860.
- 997 [39] V. V. Shutova et al. “Effect of particle size on the enzymatic hydrolysis  
998 of polysaccharides from ultrafine lignocellulose particles”. In: *Applied*  
999 *Biochemistry and Microbiology* 48.3 (May 2012), pp. 312–317.
- 1000 [40] J. E. Bailey and Y. K. Cho. “Immobilization of glucoamylase and glucose  
1001 oxidase in activated carbon: Effects of particle size and immobilization  
1002 conditions on enzyme activity and effectiveness”. In: *Biotechnology and*  
1003 *Bioengineering* 25.8 (1983), pp. 1923–1935.
- 1004 [41] H. Jia, G. Zhu, and P. Wang. “Catalytic behaviors of enzymes attached  
1005 to nanoparticles: the effect of particle mobility”. In: *Biotechnology and*  
1006 *Bioengineering* 84.4 (2003), pp. 406–414.
- 1007 [42] H.-X. Zhou. “How do biomolecular systems speed up and regulate rates?”  
1008 In: *Phys. Biol.* 2.3 (2005), R1–R25.
- 1009 [43] R. A. Alberty and G. G. Hammes. “Application of the Theory of Diffusion-  
1010 controlled Reactions to Enzyme Kinetics”. In: *The Journal of Physical*  
1011 *Chemistry* 62.2 (1958), pp. 154–159.
- 1012 [44] S. Schoffelen and J. C. M. van Hest. “Multi-enzyme systems: bringing  
1013 enzymes together in vitro”. In: *Soft Matter* (2012).
- 1014 [45] A. Kuzmak et al. “Can enzyme proximity accelerate cascade reactions?”  
1015 In: *Sci. Rep.* 9.1 (2019), pp. 1–2. ISSN: 20452322.
- 1016 [46] R. Roa et al. “Product interactions and feedback in diffusion-controlled  
1017 reactions”. In: *J. Chem. Phys.* 148.6 (2018), pp. 1–2.
- 1018 [47] C. Eun, P. M. Kekenus-Huskey, and J. A. McCammon. “Influence of  
1019 neighboring reactive particles on diffusion-limited reactions”. In: *J. Chem.*  
1020 *Phys.* 139.4 (2013), p. 044117. ISSN: 0021-9606.
- 1021 [48] H.-X. Zhou. “Rate theories for biologists”. In: *Quarterly reviews of bio-*  
1022 *physics* 43.2 (May 2010), pp. 219–93.
- 1023 [49] P. M. Kekenus-Huskey et al. “Finite-element estimation of protein lig-  
1024 and association rates with post-encounter effects: applications to calcium  
1025 binding in troponin C and SERCA”. In: *Computational Science Discov-*  
1026 *ery* 5.1 (2012), p. 014015.

- 1027 [50] Y.-m. M. Huang et al. “Brownian dynamic study of an enzyme metabolon  
1028 in the TCA cycle: Substrate kinetics and channeling”. In: *Protein Sci.*  
1029 27.2 (2018), pp. 463–471. ISSN: 09618368.
- 1030 [51] B. Sun et al. “Simulation-based characterization of electrolyte and small  
1031 molecule diffusion in oriented mesoporous silica thin films”. In: *chem-*  
1032 *rxiv.org* (), pp. 1–2.
- 1033 [52] P. M. Kekenés-Huskey, A. K. Gillette, and J. A. McCammon. “Predicting  
1034 the influence of long-range molecular interactions on macroscopic-scale  
1035 diffusion by homogenization of the Smoluchowski equation.” In: *J. Chem.*  
1036 *Phys.* 140.17 (2014), p. 174106. ISSN: 1089-7690.
- 1037 [53] P. M. Kekenés-Huskey et al. “Finite Element Estimation of Protein-  
1038 Ligand Association Rates with Post-Encounter Effects”. In: *Comput. Sci.*  
1039 *Discov.* 5.1 (2012), pp. –20. ISSN: 1749-4699.
- 1040 [54] Rice. “Diffusion-Controlled Reactions in Solution”. In: *Compr. Chem.*  
1041 *Kinet.* 25.C (1985), pp. 3–46. ISSN: 00698040.
- 1042 [55] “Physics of chemoreception”. In: *Biophysical Journal* 20.2 (1977), pp. 193–  
1043 219.
- 1044 [56] A. Lu and R. K. O’Reilly. “Advances in nanoreactor technology us-  
1045 ing polymeric nanostructures”. In: *Curr. Opin. Biotechnol.* 24.4 (2013),  
1046 pp. 639–645. ISSN: 09581669.
- 1047 [57] L. A. Blatter and E. Niggli. “Confocal nearmembrane detection of cal-  
1048 cium in cardiac myocytes”. In: *Cell Calcium* (1998), pp. 1–2.
- 1049 [58] F. Verdonck, K. Mubagwa, and K. R. Sipido. “[Na<sup>+</sup>] in the subsarcolem-  
1050 mal fuzzy space and modulation of [Ca<sup>2+</sup>]<sub>i</sub> and contraction in cardiac  
1051 myocytes”. In: *Cell Calcium* 35.6 (2004), pp. 603–612.
- 1052 [59] S. Salgin, U. Salgin, and S. Bahadir. “Zeta Potentials and Isoelectric  
1053 Points of Biomolecules: The Effects of Ion Types and Ionic Strengths”.  
1054 In: *Int. J. Electrochem. Sci* 7 (2012), pp. 12404–12414.
- 1055 [60] K. Clarke et al. “The  $\beta/\alpha$  peak height ratio of ATP. A measure of  
1056 free [Mg<sup>2+</sup>] using <sup>31</sup>P NMR”. In: *Journal of Biological Chemistry* 271.35  
1057 (Aug. 1996), pp. 21142–21150. ISSN: 00219258.
- 1058 [61] L. H. Klausen, T. Fuhs, and M. Dong. “Mapping surface charge density  
1059 of lipid bilayers by quantitative surface conductivity microscopy”. In:  
1060 *Nat. Commun.* 7.1 (2016), p. 12447. ISSN: 2041-1723.
- 1061 [62] C. Moyne and M. A. Murad. “A Two-Scale Model for Coupled Electro-  
1062 Chemo-Mechanical Phenomena and Onsager’s Reciprocity Relations in  
1063 Expansive Clays: II Computational Validation”. In: *Transp. porous media*  
1064 62.1 (2006), pp. 13–56.
- 1065 [63] G. Schreiber and A. R. Fersht. “Rapid, electrostatically assisted associ-  
1066 ation of proteins”. In: *Nat. Struct. Mol. Biol.* 3.5 (1996), pp. 427–431.
- 1067 [64] B. S. Khakh and R. A. North. “Neuromodulation by extracellular ATP  
1068 and P2X receptors in the CNS”. In: *Neuron* (2012), pp. 1–2.
- 1069 [65] T. L. Moser et al. “Endothelial cell surface F1-FO ATP synthase is active  
1070 in ATP synthesis and is inhibited by angiostatin”. In: *Proc. Natl. Acad.*  
1071 *Sci.* 98.12 (2001), pp. 6656–6661. ISSN: 0027-8424.

- 1072 [66] G. Cardouat et al. “Ectopic adenine nucleotide translocase activity controls extracellular ADP levels and regulates the F<sub>1</sub>-ATPase-mediated HDL endocytosis pathway on hepatocytes”. In: *Biochim. Biophys. Acta - Mol. Cell Biol. Lipids* 1862.9 (2017), pp. 832–841. ISSN: 13881981.
- 1073  
1074  
1075
- 1076 [67] D. Choquet and A. Triller. “The dynamic synapse.” In: *Neuron* 80.3 (2013), pp. 691–703. ISSN: 1097-4199.
- 1077
- 1078 [68] D. P. Schafer, E. K. Lehrman, and B. Stevens. “The quad-partite synapse: Microglia-synapse interactions in the developing and mature CNS”. In: *Glia* 61.1 (2013), pp. 24–36.
- 1079  
1080
- 1081 [69] A. Kittel et al. “Co-localization of P2Y<sub>1</sub> receptor and NTPDase1/CD39 within caveolae in human placenta.” In: *Eur. J. Histochem.* 48.3 (), pp. 253–9. ISSN: 1121-760X.
- 1082  
1083
- 1084 [70] S. M. Joseph, M. R. Buchakjian, and G. R. Dubyak. “Colocalization of ATP Release Sites and Ecto-ATPase Activity at the Extracellular Surface of Human Astrocytes”. In: *J. Biol. Chem.* 278.26 (2003), pp. 23331–23342. ISSN: 0021-9258.
- 1085  
1086  
1087
- 1088 [71] M. Garcia-Marcos, J.-P. Dehaye, and A. Marino. “Membrane compartments and purinergic signalling: the role of plasma membrane microdomains in the modulation of P2XR-mediated signalling”. In: *FEBS J.* 276.2 (2009), pp. 330–340. ISSN: 1742464X.
- 1089  
1090  
1091
- 1092 [72] R. L. Winslow and J. L. Greenstein. “Cardiac myocytes and local signaling in nano-domains”. In: *Prog. Biophys. Mol. Biol.* 107.1 (2011), pp. 48–59.
- 1093  
1094
- 1095 [73] G. G. Putzel, M. Tagliazucchi, and I. Szleifer. “Nonmonotonic Diffusion of Particles Among Larger Attractive Crowding Spheres”. In: *Phys. Rev. Lett.* 113.13 (2014), p. 138302.
- 1096  
1097
- 1098 [74] J. Balbo et al. “The Shape of Protein Crowders is a Major Determinant of Protein Diffusion”. In: *Biophys. J.* 104.7 (2013), pp. 1576–1584.
- 1099
- 1100 [75] A. H. Elcock and J. A. McCammon. “Evidence for electrostatic channeling in a fusion protein of malate dehydrogenase and citrate synthase”. In: *Biochemistry* 35.39 (1996), pp. 12652–12658.
- 1101  
1102
- 1103 [76] C. Madry et al. “Effects of the ecto-ATPase apyrase on microglial ramification and surveillance reflect cell depolarization, not ATP depletion”. In: *Proc. Natl. Acad. Sci.* (2018), p. 201715354. ISSN: 0027-8424.
- 1104  
1105
- 1106 [77] J. M. Sanz and F. D. Virgilio. “Kinetics and Mechanism of ATP-Dependent IL-1 Release from Microglial Cells”. In: *J. Immunol.* 164.9 (2000), pp. 4893–4898. ISSN: 0022-1767.
- 1107  
1108
- 1109 [78] R. A. Alberty and R. N. Goldberg. “Standard thermodynamic formation properties for the adenosine 5'-triphosphate series”. In: *Biochemistry* 31.43 (1992), pp. 10610–10615. ISSN: 0006-2960.
- 1110  
1111
- 1112 [79] A. M. Romani. “Cellular magnesium homeostasis”. In: *Arch. Biochem. Biophys.* 512.1 (2011), pp. 1–23. ISSN: 00039861.
- 1113
- 1114 [80] P. Wagh et al. “Increasing Salt Rejection of Polybenzimidazole Nanofiltration Membranes via the Addition of Immobilized and Aligned Aquaporins”. In: *Processes* 7.2 (2019), p. 76. ISSN: 2227-9717.
- 1115  
1116

- 1117 [81] M. Duarte-Araujo et al. “Relative contribution of ecto-ATPase and ecto-  
1118 ATPDase pathways to the biphasic effect of ATP on acetylcholine re-  
1119 lease from myenteric motoneurons”. In: *Br. J. Pharmacol.* 156.3 (2009),  
1120 pp. 519–533. ISSN: 00071188.
- 1121 [82] J. L. Barreda and H. X. Zhou. “Theory and simulation of diffusion-  
1122 influenced, stochastically gated ligand binding to buried sites”. In: *J.*  
1123 *Chem. Phys.* (2011).
- 1124 [83] H. X. H. X. Zhou, S. T. S. T. Wlodek, and J. A. J. A. McCammon.  
1125 “Conformation gating as a mechanism for enzyme specificity.” In: *Proc.*  
1126 *Natl. Acad. Sci.* 95.16 (1998), pp. 9280–9283.
- 1127 [84] H. Singh et al. “Structures of the PutA peripheral membrane flavoenzyme  
1128 reveal a dynamic substrate-channeling tunnel and the quinone-binding  
1129 site”. In: *Proc. Natl. Acad. Sci.* 111.9 (2014), pp. 3389–3394. ISSN: 0027-  
1130 8424.
- 1131 [85] Y. Gao et al. “Mechanisms of Enhanced Catalysis in Enzyme-DNA Nano-  
1132 structures Revealed through Molecular Simulations and Experimental  
1133 Analysis”. In: *ChemBioChem* 17.15 (2016), pp. 1430–1436. ISSN: 14394227.
- 1134 [86] C. C. Roberts and C.-e. A. Chang. “Modeling of Enhanced Catalysis  
1135 in Multienzyme Nanostructures: Effect of Molecular Scaffolds, Spatial  
1136 Organization, and Concentration”. In: *J. Chem. Theory Comput.* 11.1  
1137 (2015), pp. 286–292.
- 1138 [87] E. Hilario et al. “Visualizing the tunnel in tryptophan synthase with  
1139 crystallography: Insights into a selective filter for accommodating indole  
1140 and rejecting water”. In: *Biochim. Biophys. Acta - Proteins Proteomics*  
1141 1864.3 (2016), pp. 268–279. ISSN: 15709639.
- 1142 [88] H. Singh et al. “Structures of the PutA peripheral membrane flavoenzyme  
1143 reveal a dynamic substrate-channeling tunnel and the quinone-binding  
1144 site”. In: *Proc. Natl. Acad. Sci.* 111.9 (2014), pp. 3389–3394. ISSN: 0027-  
1145 8424.
- 1146 [89] M. Luo et al. “Evidence That the C-Terminal Domain of a Type B PutA  
1147 Protein Contributes to Aldehyde Dehydrogenase Activity and Substrate  
1148 Channeling”. In: *Biochemistry* 53.35 (2014), pp. 5661–5673. ISSN: 0006-  
1149 2960.
- 1150 [90] Y. Cheng et al. “Diffusional Channeling in the Sulfate-Activating Com-  
1151 plex: Combined Continuum Modeling and Coarse-Grained Brownian Dy-  
1152 namics Studies”. In: *Biophys. J.* 95.10 (2008), pp. 4659–4667. ISSN: 1542-  
1153 0086.
- 1154 [91] A. H. Chen and P. A. Silver. “Designing biological compartmentaliza-  
1155 tion”. In: *Trends Cell Biol.* (2012).
- 1156 [92] R. J. Conrado, J. D. Varner, and M. P. DeLisa. “Engineering the spa-  
1157 tial organization of metabolic enzymes: mimicking nature’s synergy”. In:  
1158 *Curr. Opin. Biotechnol.* (2008), pp. 1–2.
- 1159 [93] V. A. Selivanov et al. “Modeling of Spatial Metabolite Distributions in  
1160 the Cardiac Sarcomere”. In: *Biophys. J.* 92.10 (2007), pp. 3492–3500.
- 1161 [94] M. Z. Anwar et al. “SnO<sub>2</sub> hollow nanotubes : a novel and efficient  
1162 support matrix for enzyme immobilization”. In: *Sci. Rep.* October (2017),  
1163 pp. 1–11. ISSN: 2045-2322.

- 1164 [95] J. G. McCarron et al. “Subplasma membrane Ca<sup>2+</sup> signals”. In: *IUBMB*  
1165 *Life* 64.7 (2012), pp. 573–585.
- 1166 [96] J. M. Aronsen, F. Swift, and O. M. Sejersted. “Cardiac sodium trans-  
1167 port and excitation contraction coupling”. In: *J. Mol. Cell. Cardiol.* 61.C  
1168 (2013), pp. 11–19.
- 1169 [97] D. M. Bers. “Cardiac excitation-contraction coupling”. In: *Nature* 415.6868  
1170 (2002), pp. 198–205.
- 1171 [98] B. Sun et al. “Thermodynamics of Cation Binding to the Sarcoendoplas-  
1172 mic Reticulum Calcium ATPase Pump and Impacts on Enzyme Func-  
1173 tion”. In: *J. Chem. Theory Comput.* (2019), acs.jctc.8b01312. ISSN: 1549-  
1174 9618.
- 1175 [99] T. Yeung and S. Grinstein. “Lipid signaling and the modulation of surface  
1176 charge during phagocytosis”. In: *Immunol. Rev.* 219.1 (2007), pp. 17–36.  
1177 ISSN: 0105-2896.
- 1178 [100] M. Holst, N. Baker, and F. Wang. “Adaptive multilevel finite element  
1179 solution of the Poisson-Boltzmann equation I. Algorithms and examples”.  
1180 In: *J. Comput. Chem.* 21.15 (2000), pp. 1319–1342.
- 1181 [101] A. H. Elcock, G. A. Huber, and J. A. McCammon. “Electrostatic Chan-  
1182 neling of Substrates between Enzyme Active Sites”. In: *Biochemistry*  
1183 36.51 (1997), pp. 16049–16058.
- 1184 [102] A. H. Elcock et al. “Electrostatic Channeling in the Bifunctional Enzyme  
1185 Dihydrofolate Reductase-thymidylate Synthase”. In: *J. Mol. Biol.* 262.3  
1186 (1996), pp. 370–374.
- 1187 [103] J. N. Israelachvili. *Intermolecular and Surface Forces*. Academic Press,  
1188 1992, p. 704.
- 1189 [104] P. Keken-Huskey et al. “Molecular and subcellular-scale modeling of  
1190 nucleotide diffusion in the cardiac myofilament lattice”. In: *Biophys. J.*  
1191 105.9 (2013), pp. 2130–2140. ISSN: 00063495 15420086.
- 1192 [105] T. Liao et al. “Multi-core CPU or GPU-accelerated Multiscale Model-  
1193 ing for Biomolecular Complexes.” In: *Mol. Based Math. Biol.* 1 (2013),  
1194 pp. 164–179.
- 1195 [106] M. Feig et al. “Complete atomistic model of a bacterial cytoplasm for in-  
1196 tegrating physics, biochemistry, and systems biology”. In: *J. Mol. Graph.*  
1197 *Model.* 58 (2015), pp. 1–9.
- 1198 [107] Y. Cheng et al. “Continuum simulations of acetylcholine diffusion with  
1199 reaction-determined boundaries in neuromuscular junction models”. In:  
1200 *Biophys. Chem.* (2007). ISSN: 03014622.
- 1201 [108] P. R. Shorten and J. Sneyd. “A Mathematical Analysis of Obstructed  
1202 Diffusion within Skeletal Muscle”. In: *Biophys. J.* 96.12 (2009), pp. 4764–  
1203 4778.
- 1204 [109] D. J. Savage et al. “Porous silicon advances in drug delivery and im-  
1205 munotherapy”. In: *Curr. Opin. Pharmacol.* 13.5 (2013), pp. 834–841.  
1206 ISSN: 14714892.
- 1207 [110] L. Lizana, Z. Konkoli, and O. Orwar. “Tunable Filtering of Chemical  
1208 Signals in a Simple Nanoscale Reaction-Diffusion Network”. In: *J. Phys.*  
1209 *Chem. B* 111.22 (2007), pp. 6214–6219.

- 1210 [111] J. Towns et al. “XSEDE: Accelerating Scientific Discovery”. In: *Comput.*  
1211 *Sci. Eng.* 16.5 (2014), pp. 62–74.
- 1212 [112] Y. Song et al. “Finite Element Solution of the Steady-State Smoluchowski  
1213 Equation for Rate Constant Calculations”. en. In: *Biophysical Journal*  
1214 86.4 (Apr. 2004), pp. 2017–2029. ISSN: 00063495.
- 1215 [113] J. Slotboom. “Computer-aided two-dimensional analysis of bipolar tran-  
1216 sistors”. en. In: *IEEE Transactions on Electron Devices* 20.8 (Aug. 1973),  
1217 pp. 669–679. ISSN: 0018-9383.
- 1218 [114] B. Lu et al. “Poisson–Nernst–Planck equations for simulating biomolecu-  
1219 lar diffusion–reaction processes I: Finite element solutions”. en. In: *Jour-  
1220 nal of Computational Physics* 229.19 (Sept. 2010), pp. 6979–6994. ISSN:  
1221 00219991.
- 1222 [115] M. S. Alnæs et al. “The FEniCS Project Version 1.5”. In: *Archive of*  
1223 *Numerical Software* 3.100 (2015).
